# Supplementary material
Source: PubMed Central journal article supplement (PMC3091981)
Supplement: NIHMS266466-supplement-1_si_001.pdf [file NIHMS266466-supplement-1_si_001.pdf]

# Supporting Information

## Structure and biosynthesis of the marine streptomycete ansamycin ansalactam A and its distinctive branched chain polyketide extender unit

Micheal C. Wilson,<sup>†</sup> Sang-Jip Nam,<sup>†</sup> Tobias A. M. Gulder,<sup>†</sup> Christopher A. Kauffman,<sup>†</sup> Paul R. Jensen,<sup>†</sup> William Fenical,<sup>\*,†</sup> and Bradley S. Moore<sup>\*,†,‡</sup>

<sup>†</sup>Center for Marine Biotechnology and Biomedicine, Scripps Institution of Oceanography, University of California at San Diego, La Jolla, CA 92093-0204 <sup>‡</sup>Skaggs School of Pharmacy, University of California at San Diego, La Jolla, CA 92093-0204

### Table of contents

|                                                                                                                              |            |
|------------------------------------------------------------------------------------------------------------------------------|------------|
| <b>Figure S1.</b> Two possible stereoisomers and ROESY correlations of <b>4</b> .....                                        | <b>S2</b>  |
| <b>Figure S2.</b> Identification of a naphthoquinone-type AHBA synthase from CNH-189 .....                                   | <b>S3</b>  |
| <b>Figure S3.</b> <sup>1</sup> H NMR spectrum of <b>4</b> .....                                                              | <b>S4</b>  |
| <b>Figure S4.</b> <sup>13</sup> C NMR spectrum of <b>4</b> .....                                                             | <b>S5</b>  |
| <b>Figure S5.</b> gCOSY spectra of <b>4</b> .....                                                                            | <b>S6</b>  |
| <b>Figure S6.</b> gHSQC spectra of <b>4</b> .....                                                                            | <b>S7</b>  |
| <b>Figure S7.</b> gHMBC spectra of <b>4</b> .....                                                                            | <b>S8</b>  |
| <b>Figure S8.</b> ROESY spectra of <b>4</b> .....                                                                            | <b>S9</b>  |
| <b>Figure S9.</b> <sup>1</sup> H NMR spectrum of polyol product <b>5</b> of ansalactam A ( <b>4</b> ).....                   | <b>S10</b> |
| <b>Figure S10.</b> <sup>13</sup> C NMR spectrum of polyol product <b>5</b> of ansalactam A ( <b>4</b> ).....                 | <b>S11</b> |
| <b>Figure S11.</b> <sup>1</sup> H NMR spectrum of <i>bis</i> - <i>S</i> -MTPA ester ( <b>6a</b> ) of compound <b>5</b> ..... | <b>S12</b> |
| <b>Figure S12.</b> <sup>1</sup> H NMR spectrum of <i>bis</i> - <i>R</i> -MTPA ester ( <b>6b</b> ) of compound <b>5</b> ..... | <b>S13</b> |
| <b>Figure S13.</b> <sup>1</sup> H NMR spectrum of diol <b>7</b> from ansalactam A ( <b>1</b> ).....                          | <b>S14</b> |
| <b>Figure S14.</b> <sup>1</sup> H NMR spectrum of <i>bis</i> - <i>S</i> -MTPA ester ( <b>8a</b> ) of compound <b>7</b> ..... | <b>S15</b> |
| <b>Figure S15.</b> <sup>1</sup> H NMR spectrum of <i>bis</i> - <i>R</i> -MTPA ester ( <b>8b</b> ) of compound <b>7</b> ..... | <b>S16</b> |
| <b>Figure S16.</b> <sup>13</sup> C NMR spectrum of <b>5</b> from [1- <sup>13</sup> C]leucine feeding study .....             | <b>S17</b> |
| <b>Figure S17.</b> <sup>13</sup> C NMR spectrum of <b>5</b> from [1- <sup>13</sup> C]propionate feeding study .....          | <b>S18</b> |

**Figure S18.**  $^{13}\text{C}$  NMR spectrum of **5** from  $[1,2-^{13}\text{C}_2]$ acetate feeding study .....S19

**Figure S19.**  $^{13}\text{C}$  NMR spectrum of **5** from  $[1-^{13}\text{C}]$ isobutyrate feeding study.....S20

**Figure S20.** Expanded  $^{13}\text{C}$  NMR spectrum of **5** from  $[1-^{13}\text{C}]$ isobutyrate feeding study.....S21

**Figure S21.**  $^{13}\text{C}$  NMR spectrum of **5** from  $[2-^{13}\text{C}]$ 4-Me-2-pentenoate feeding study.....S22

**Figure S22.** Expanded  $^{13}\text{C}$  NMR spectrum of **5** from  $[2-^{13}\text{C}]$ 4-Me-2-pentenoate feeding study.....S23

**References**.....S24

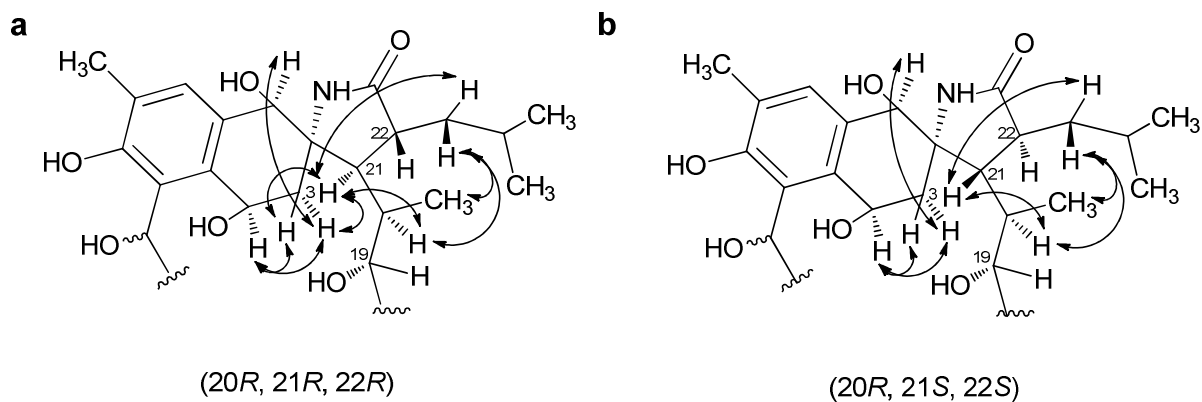

**Figure S1.** The two possible stereoisomers (a, b), and selected key ROESY correlations for determination of the configurations at C-21 and C-22 for the reduced ansalactam A alcohol (**5**).

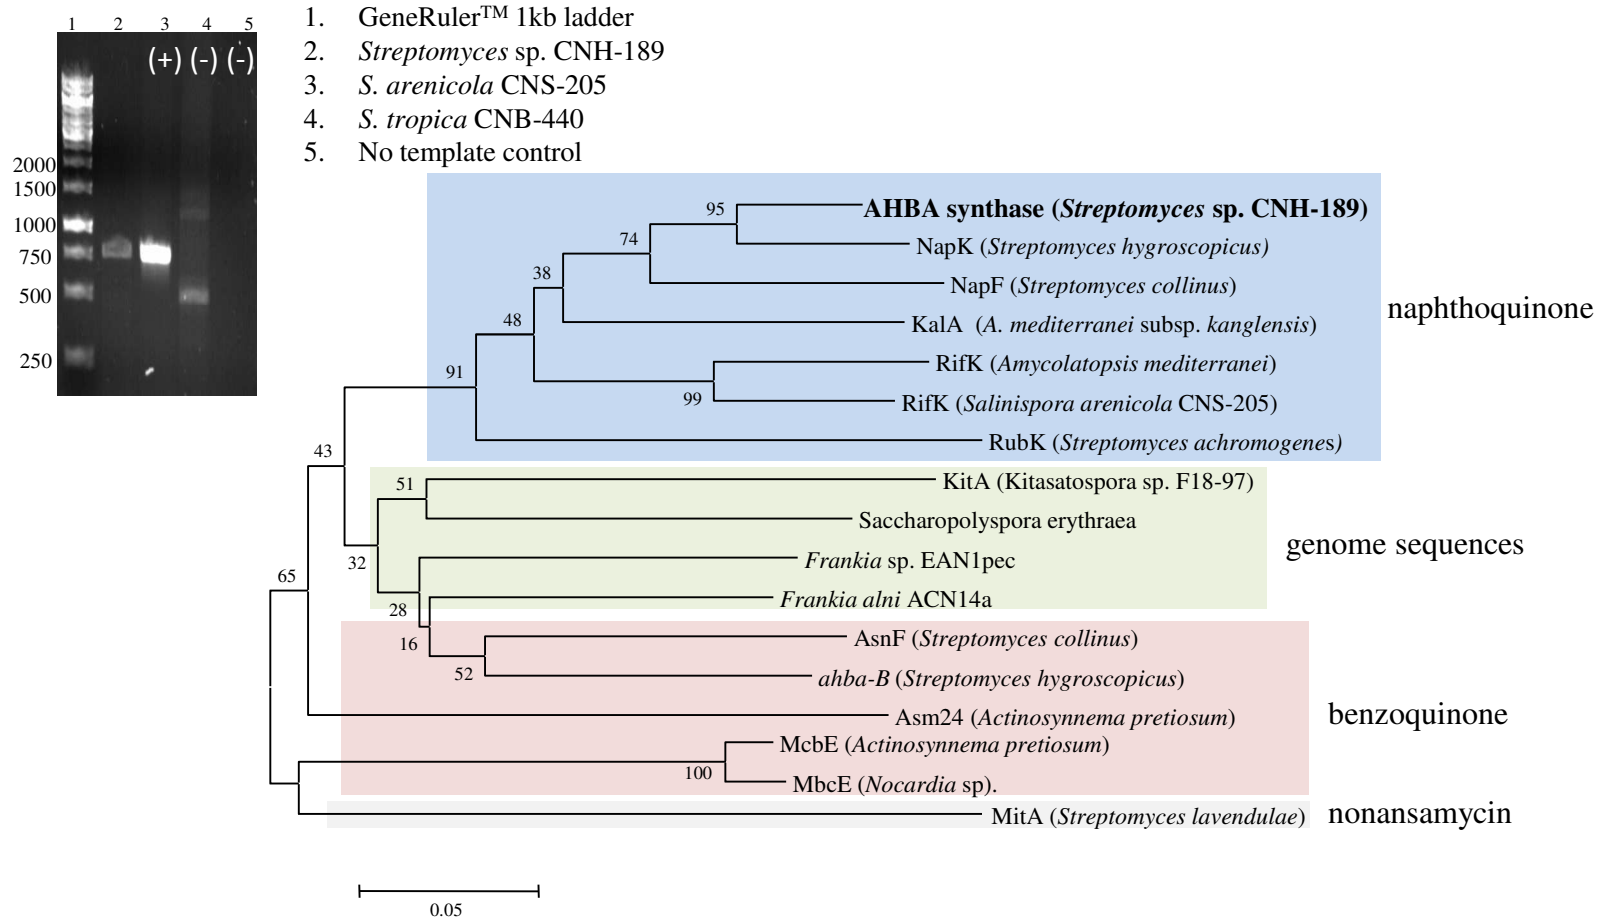

**Figure S2.** Identification of a naphthoquinone-type AHBA synthase from *S.* sp. CNH-189. PCR amplification of AHBA synthase genes from *Streptomyces* sp. strain CNH-189 (lane 2), *Salinispora arenicola* strain CNS-205 (lane 3, positive control), *S. tropica* strain CNB-440 (lane 4, negative control), and no template control (lane 5) using degenerate primers designed by Huitu et al. (see ref. 1). The 755 bp amplicon from CNH-189 was aligned in a neighbor-joining tree with AHBA synthases from characterized biosynthetic gene clusters of benzoquinone and naphthoquinone ansamycins as well as uncharacterized AHBA synthases from genome sequencing projects and the AHBA synthase involved in the biosynthesis of mitomycin, a nonansamycin compound derived from AHBA.

**Figure S3.**  $^1\text{H}$  NMR spectrum (500 MHz) of ansalactam A (**4**) in methanol- $d_4$

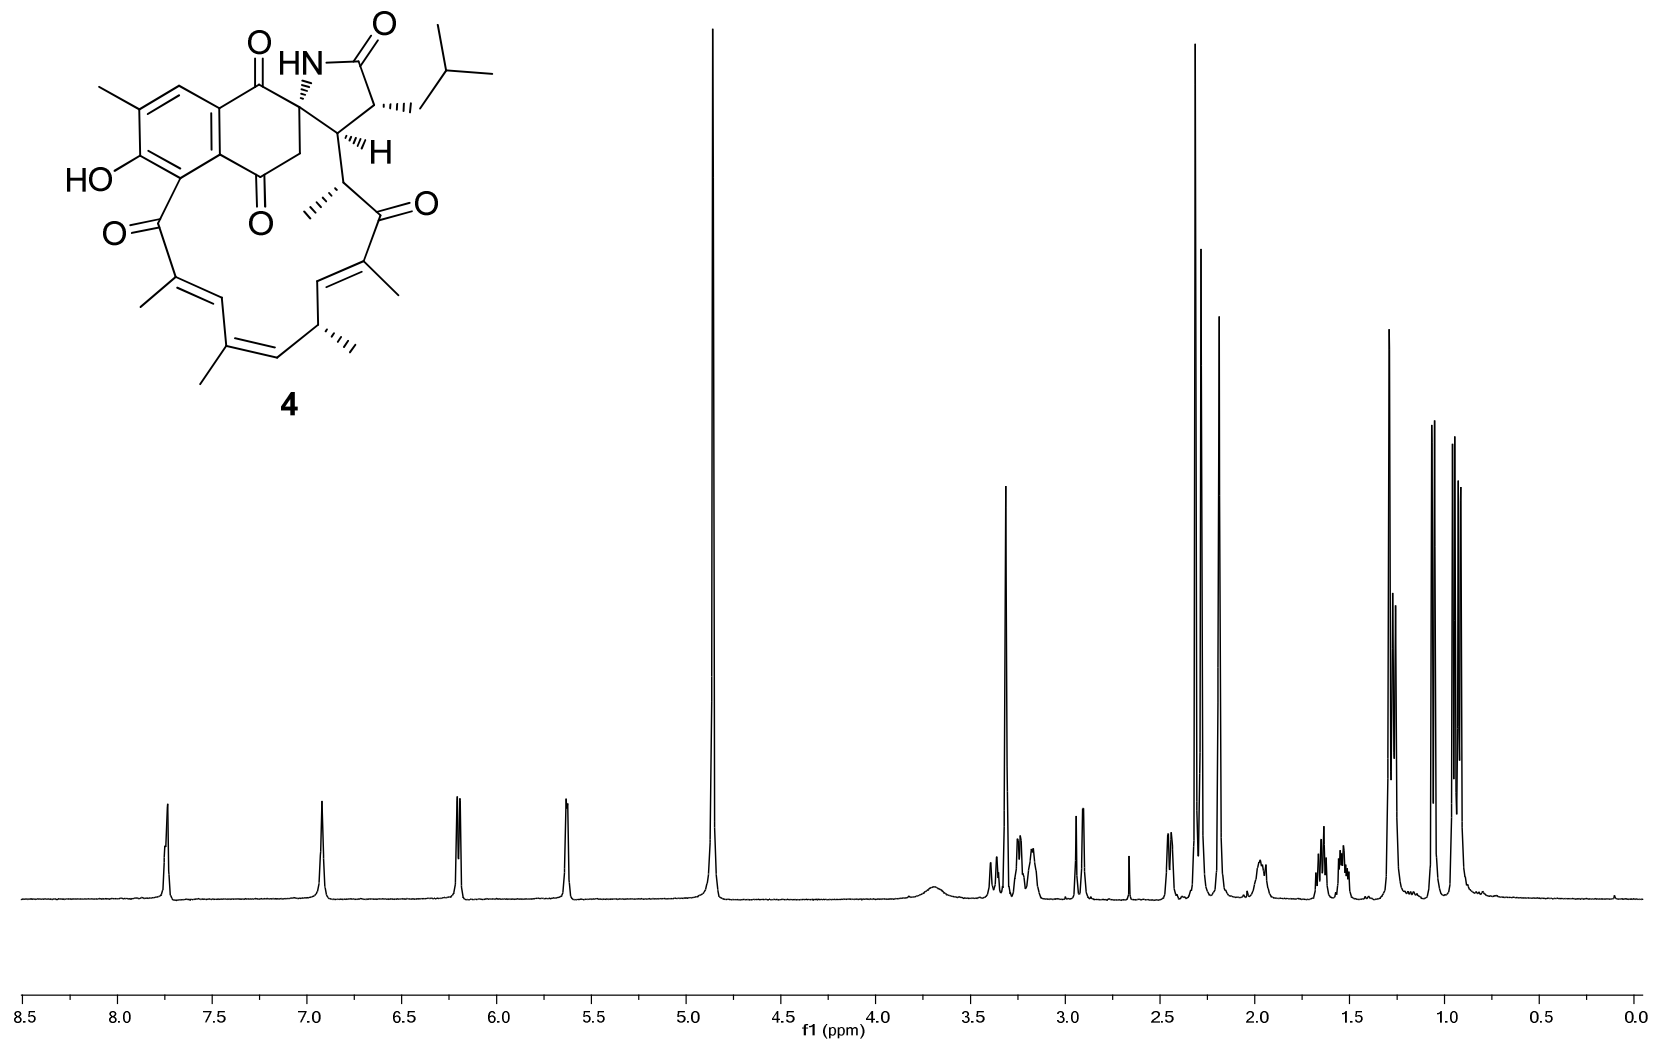

**Figure S4.**  $^{13}\text{C}$  NMR spectrum (75 MHz) of ansalactam A (**4**) in methanol- $d_4$

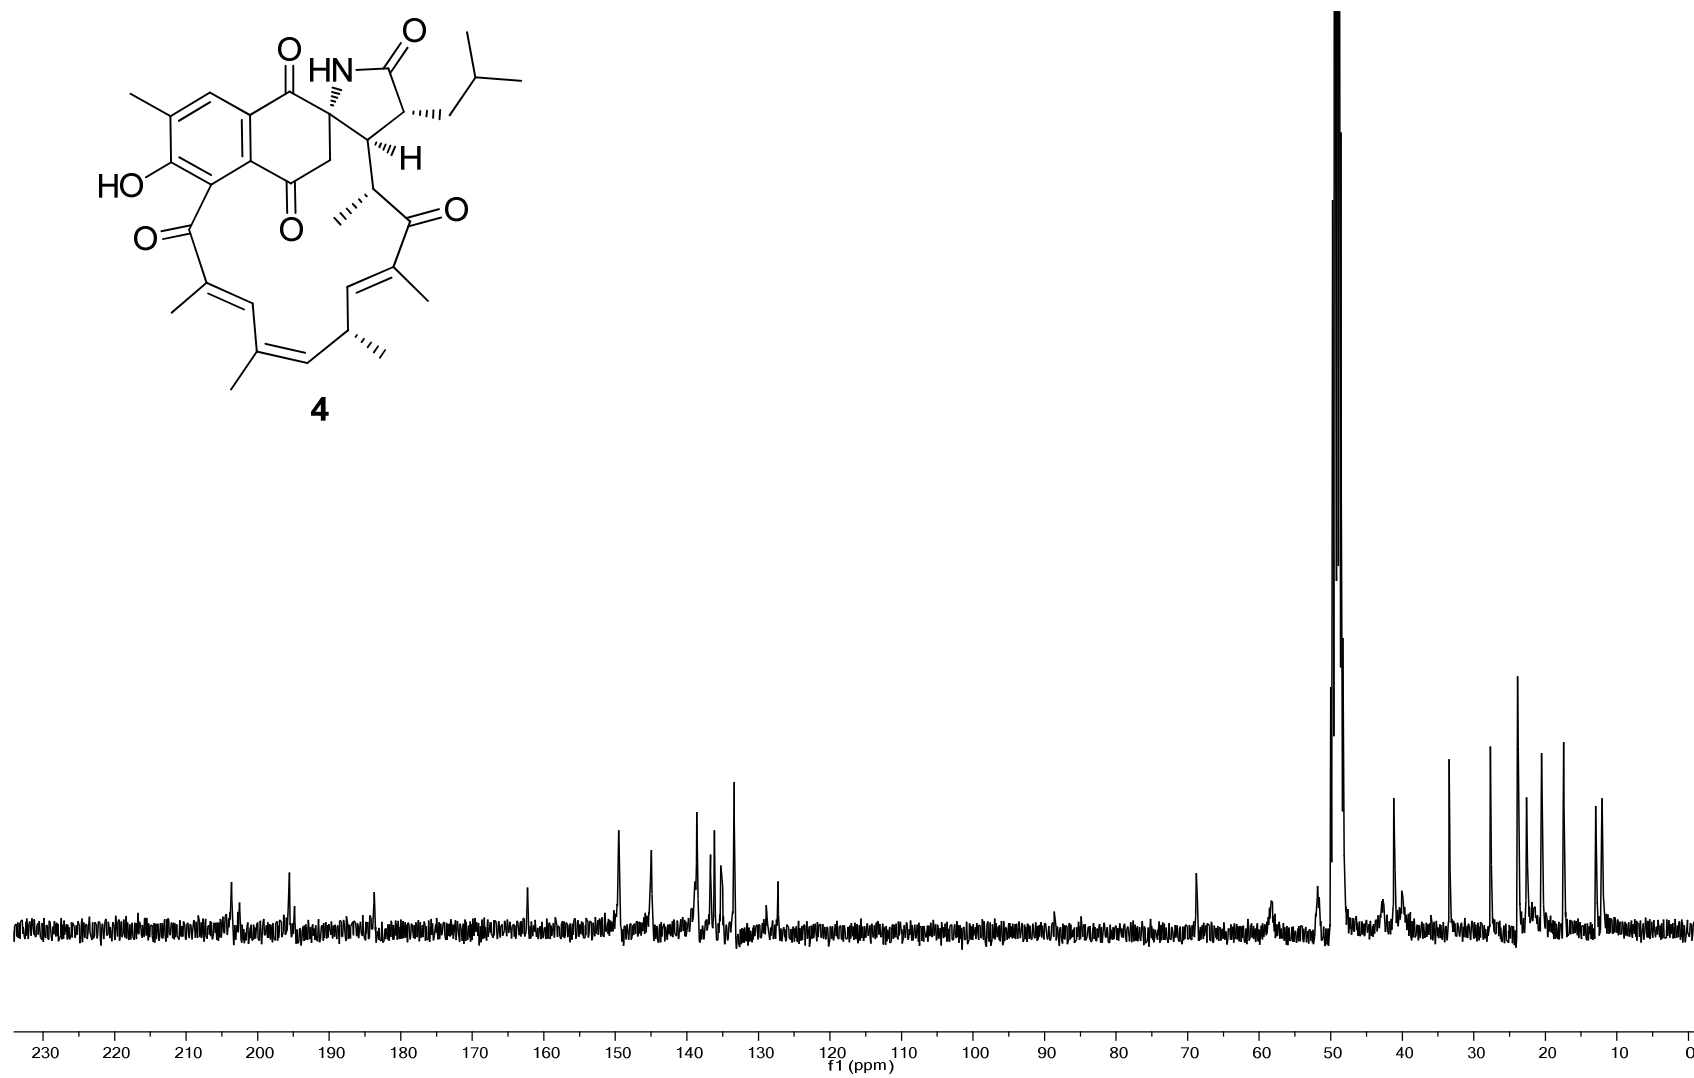

**Figure S5.** gCOSY spectra (500 MHz) of ansalactam A (**4**) in methanol- $d_4$

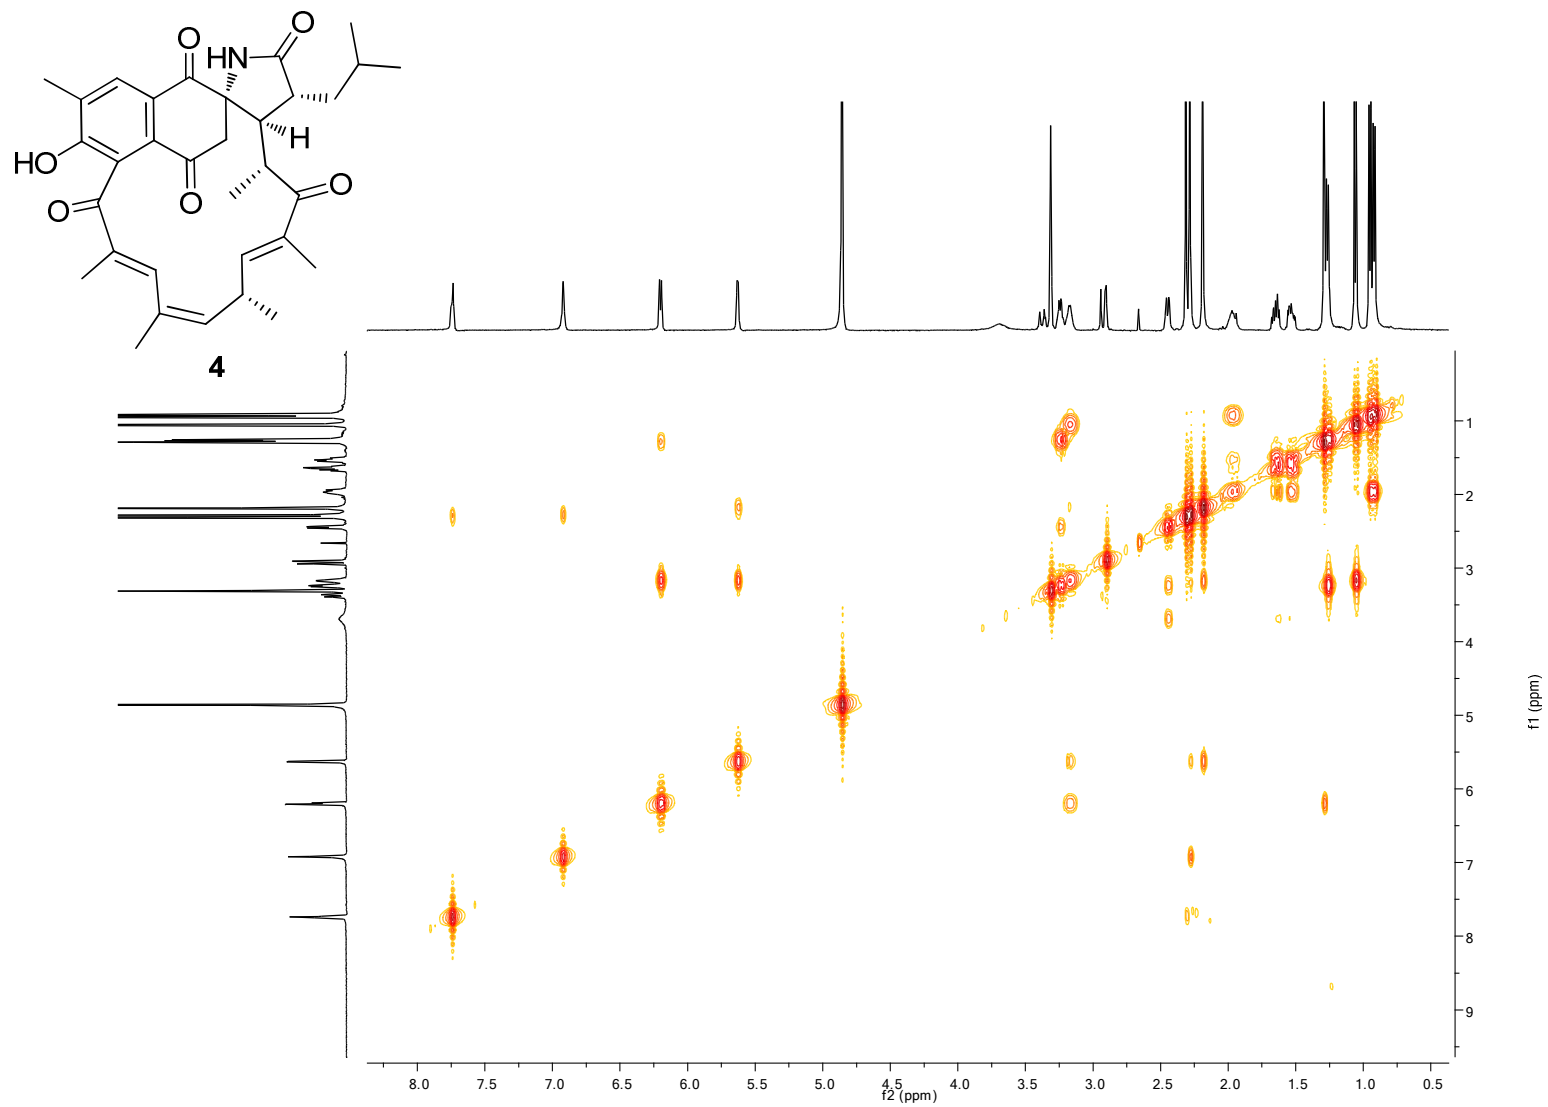

**Figure S6.** gHSQC spectra (500 MHz) of ansalactam A (**4**) in methanol- $d_4$

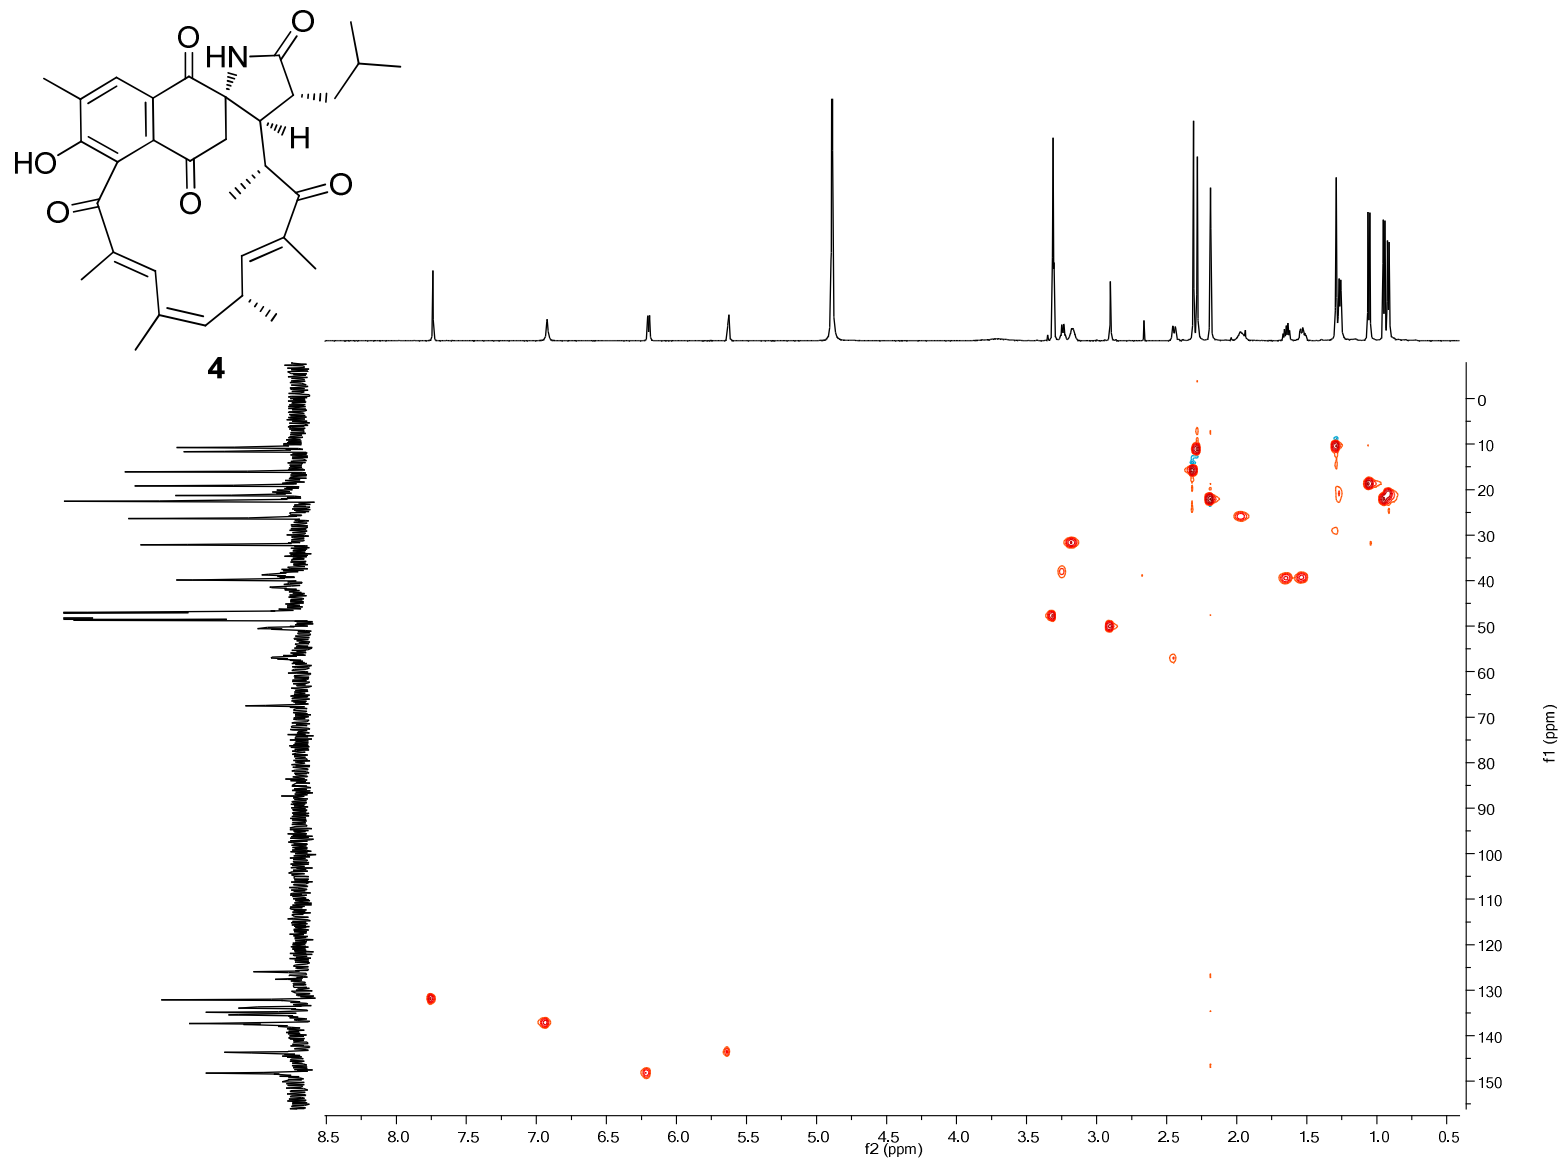

**Figure S7.** gHMBC spectra (500 MHz) of ansalactam A (**4**) in methanol-*d*<sub>4</sub>

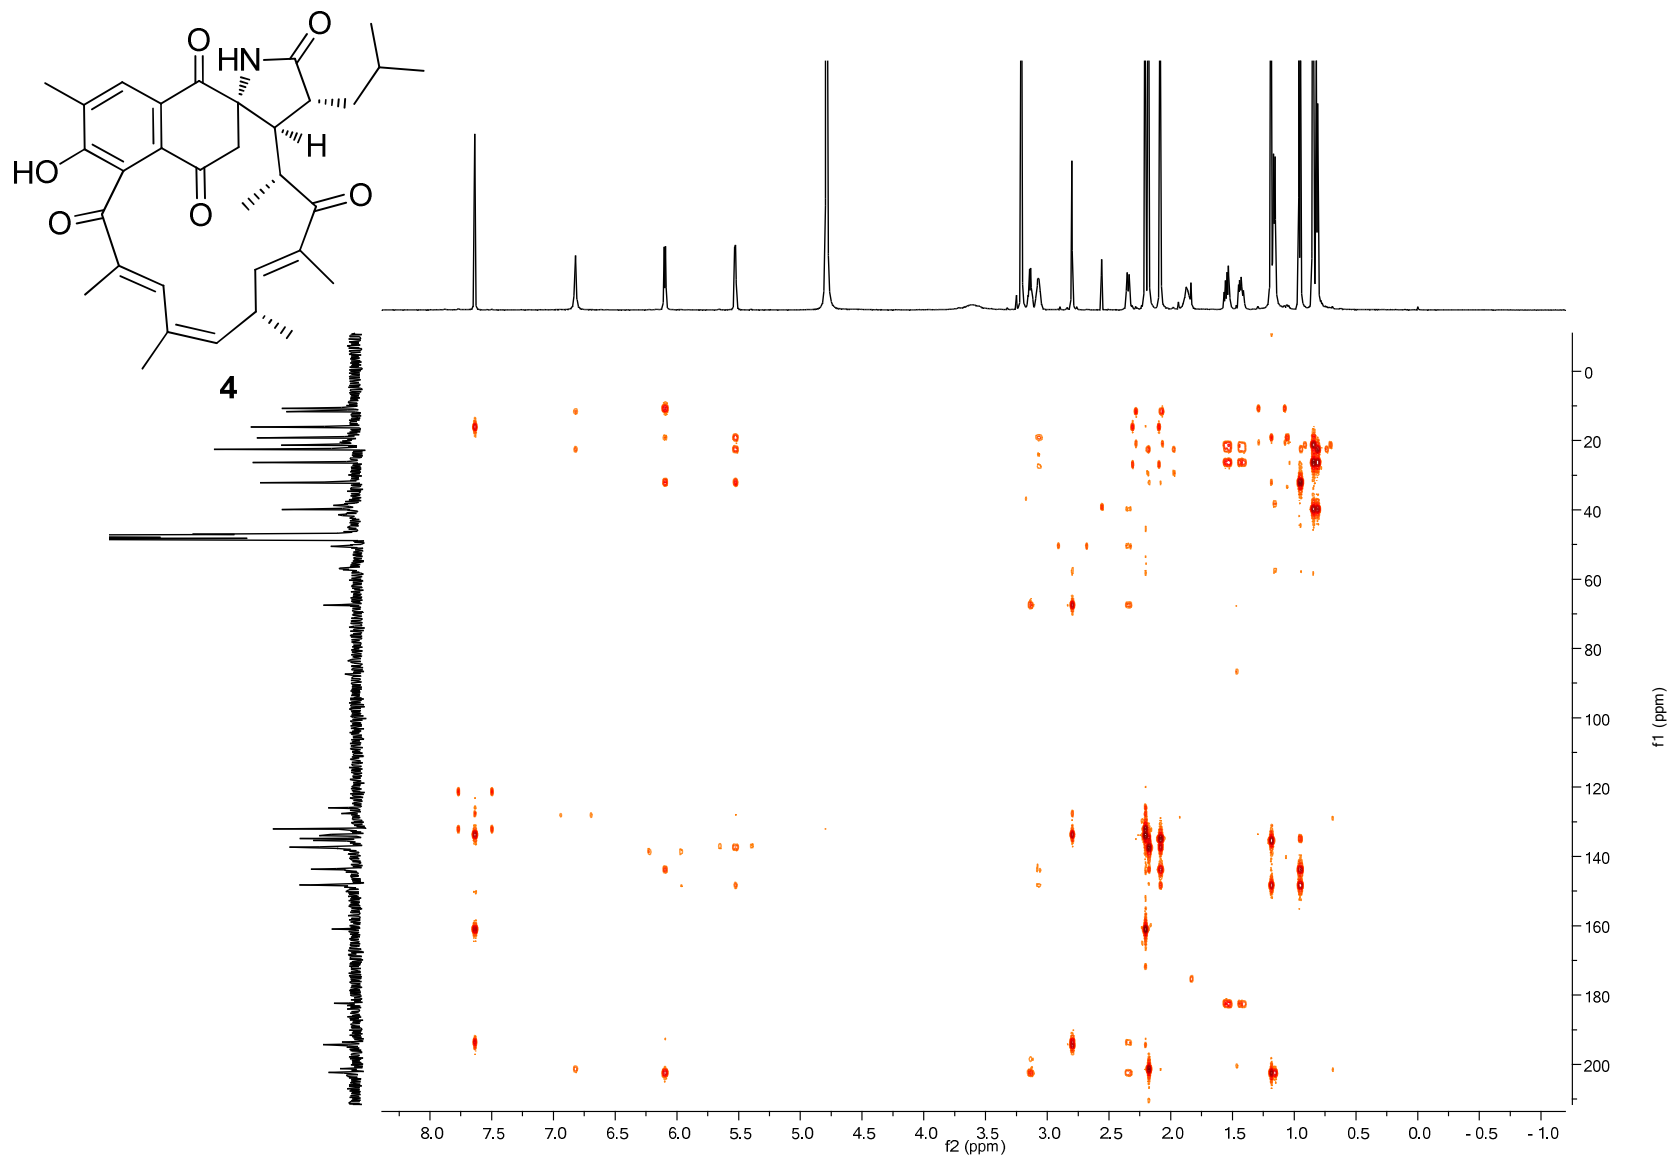



**Figure S8.** ROESY spectra (600 MHz) of ansalactam A (**4**) in methanol-*d*<sub>4</sub>

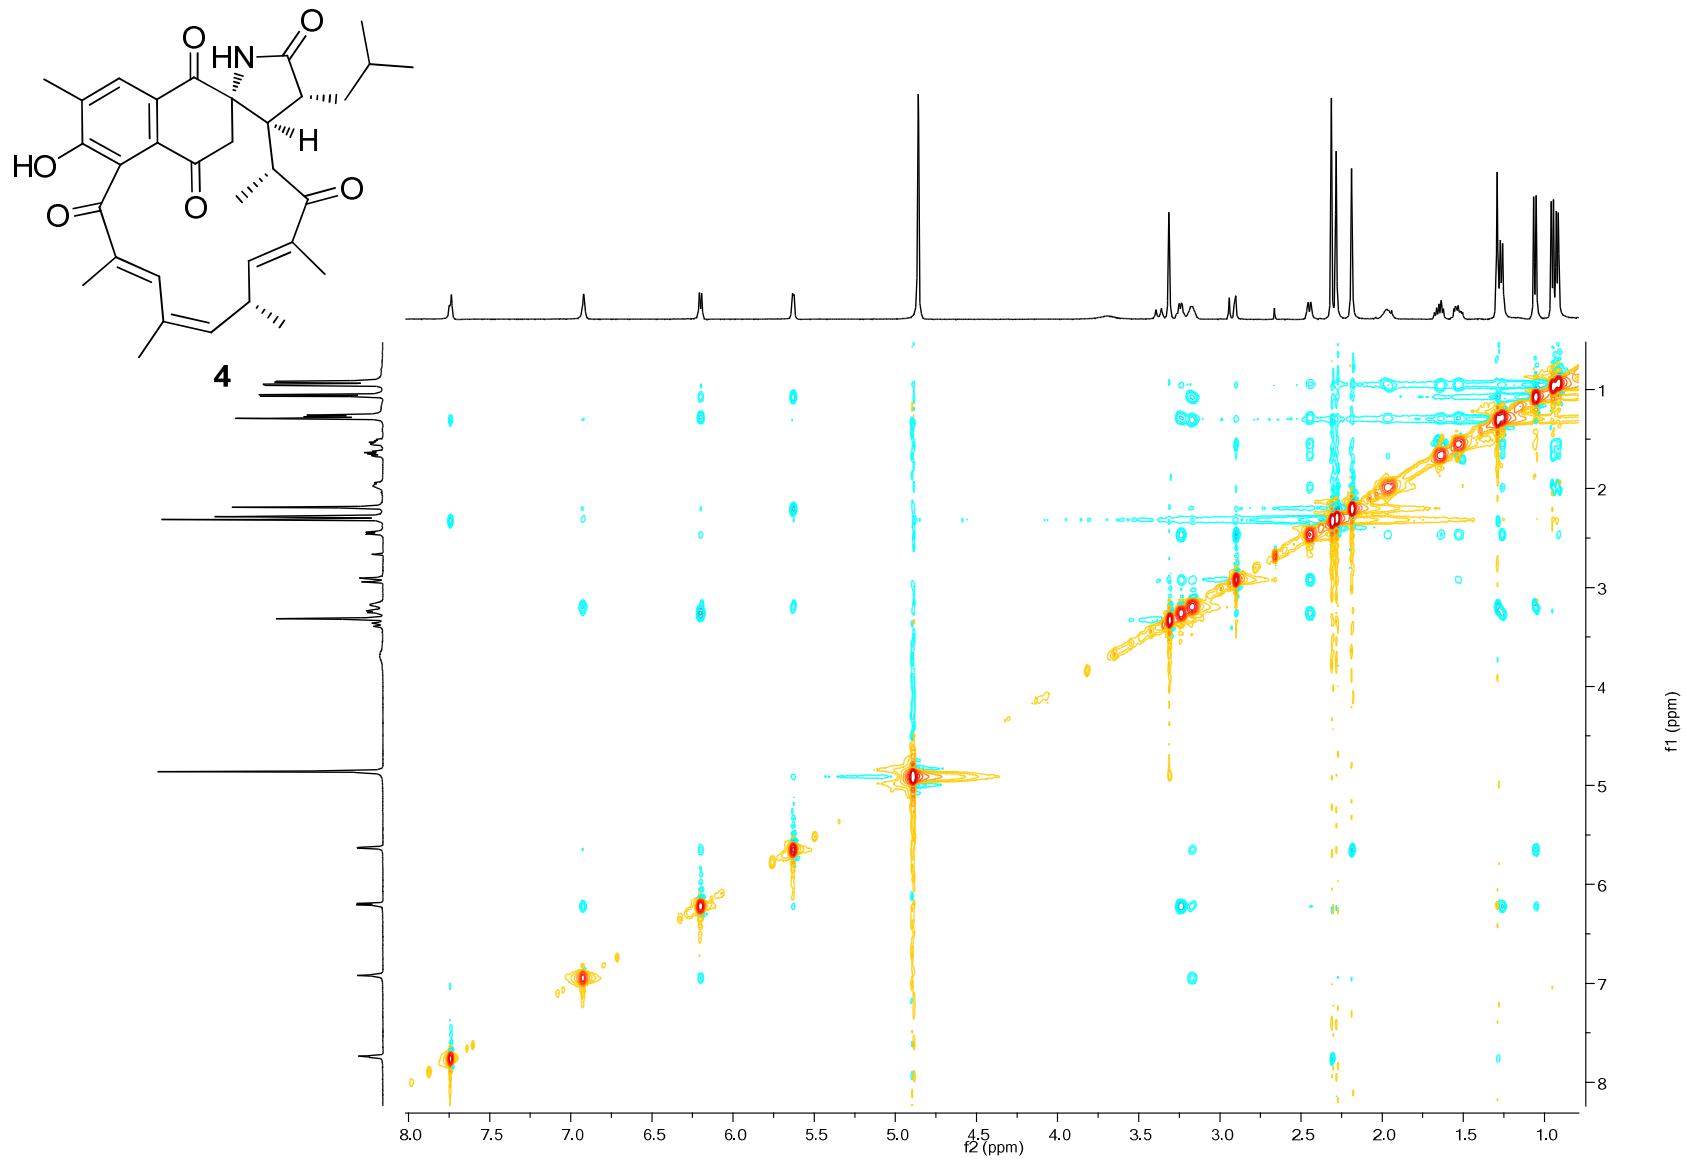

**Figure S9.**  $^1\text{H}$  NMR spectrum (600 MHz) of polyol product **5** from ansalactam A (**4**) in methanol- $d_4$

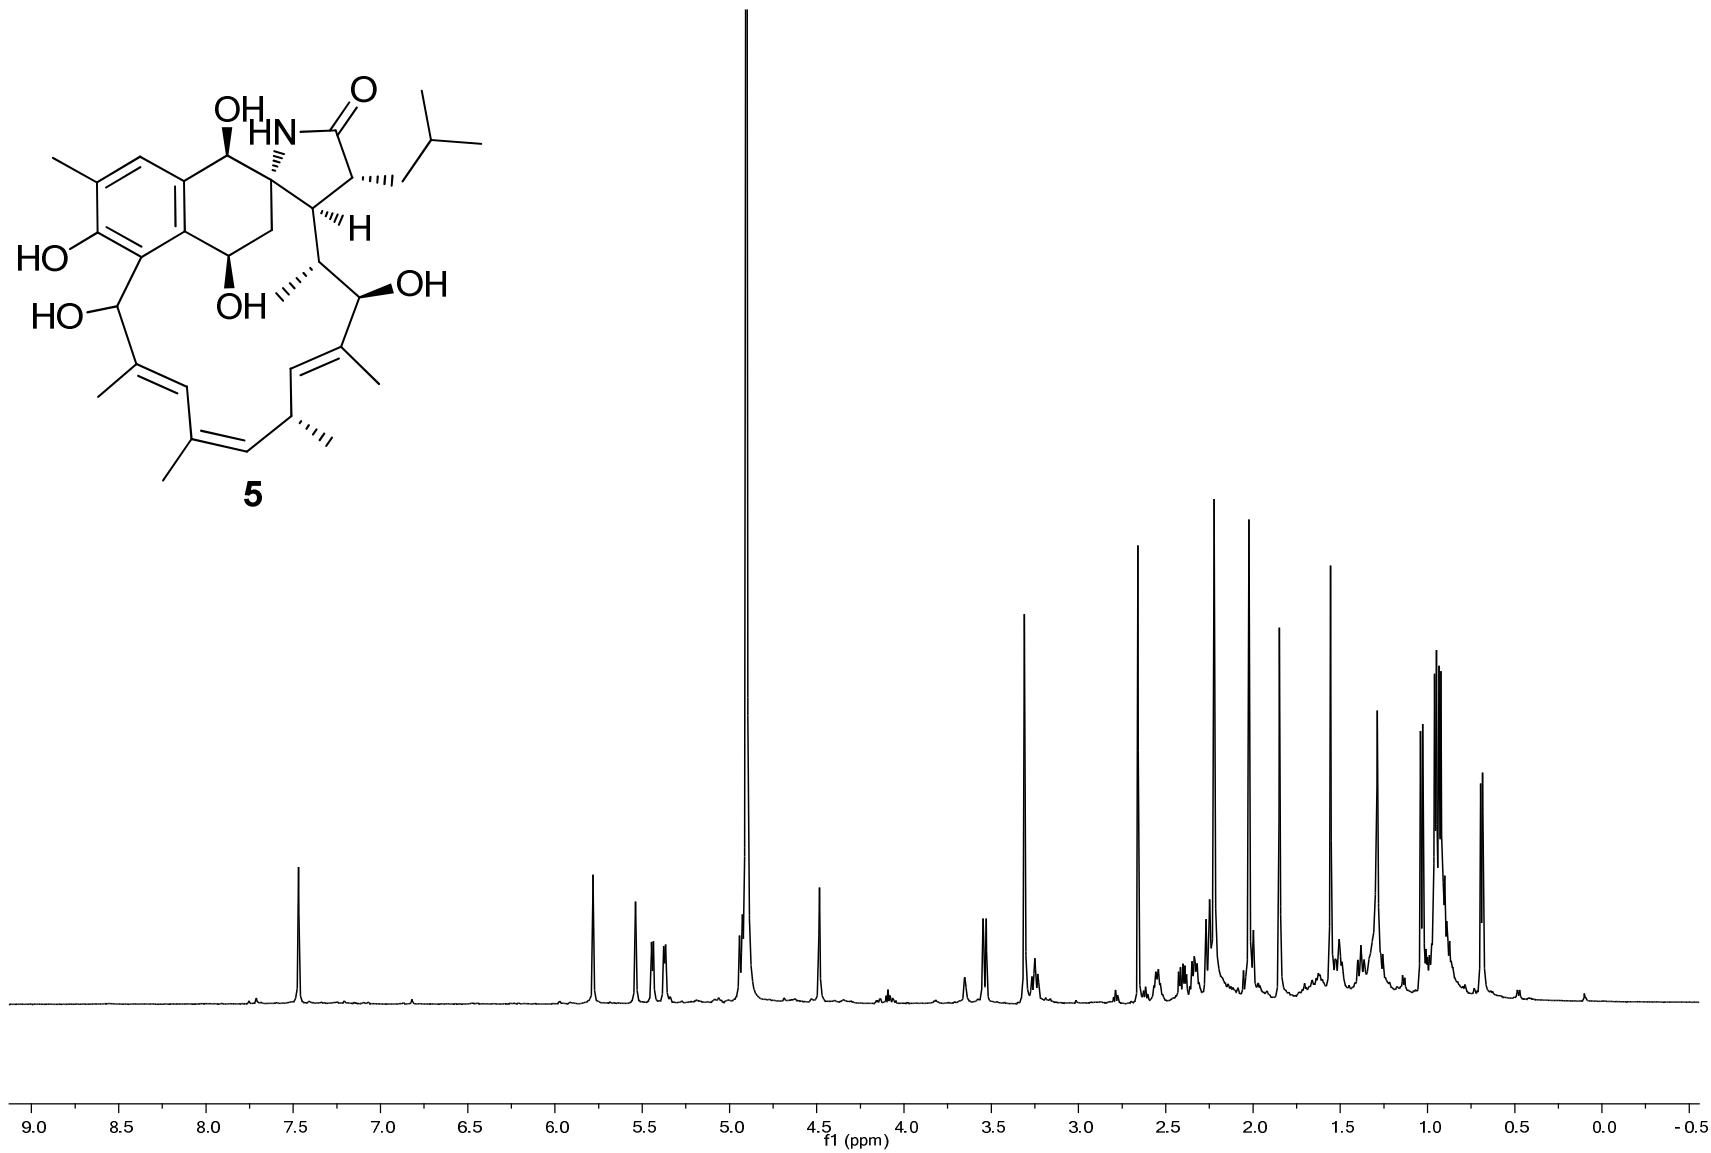

**Figure S10.**  $^{13}\text{C}$  NMR spectrum (75 MHz) of polyol product **5** from ansalactam A (**4**) in methanol- $d_4$

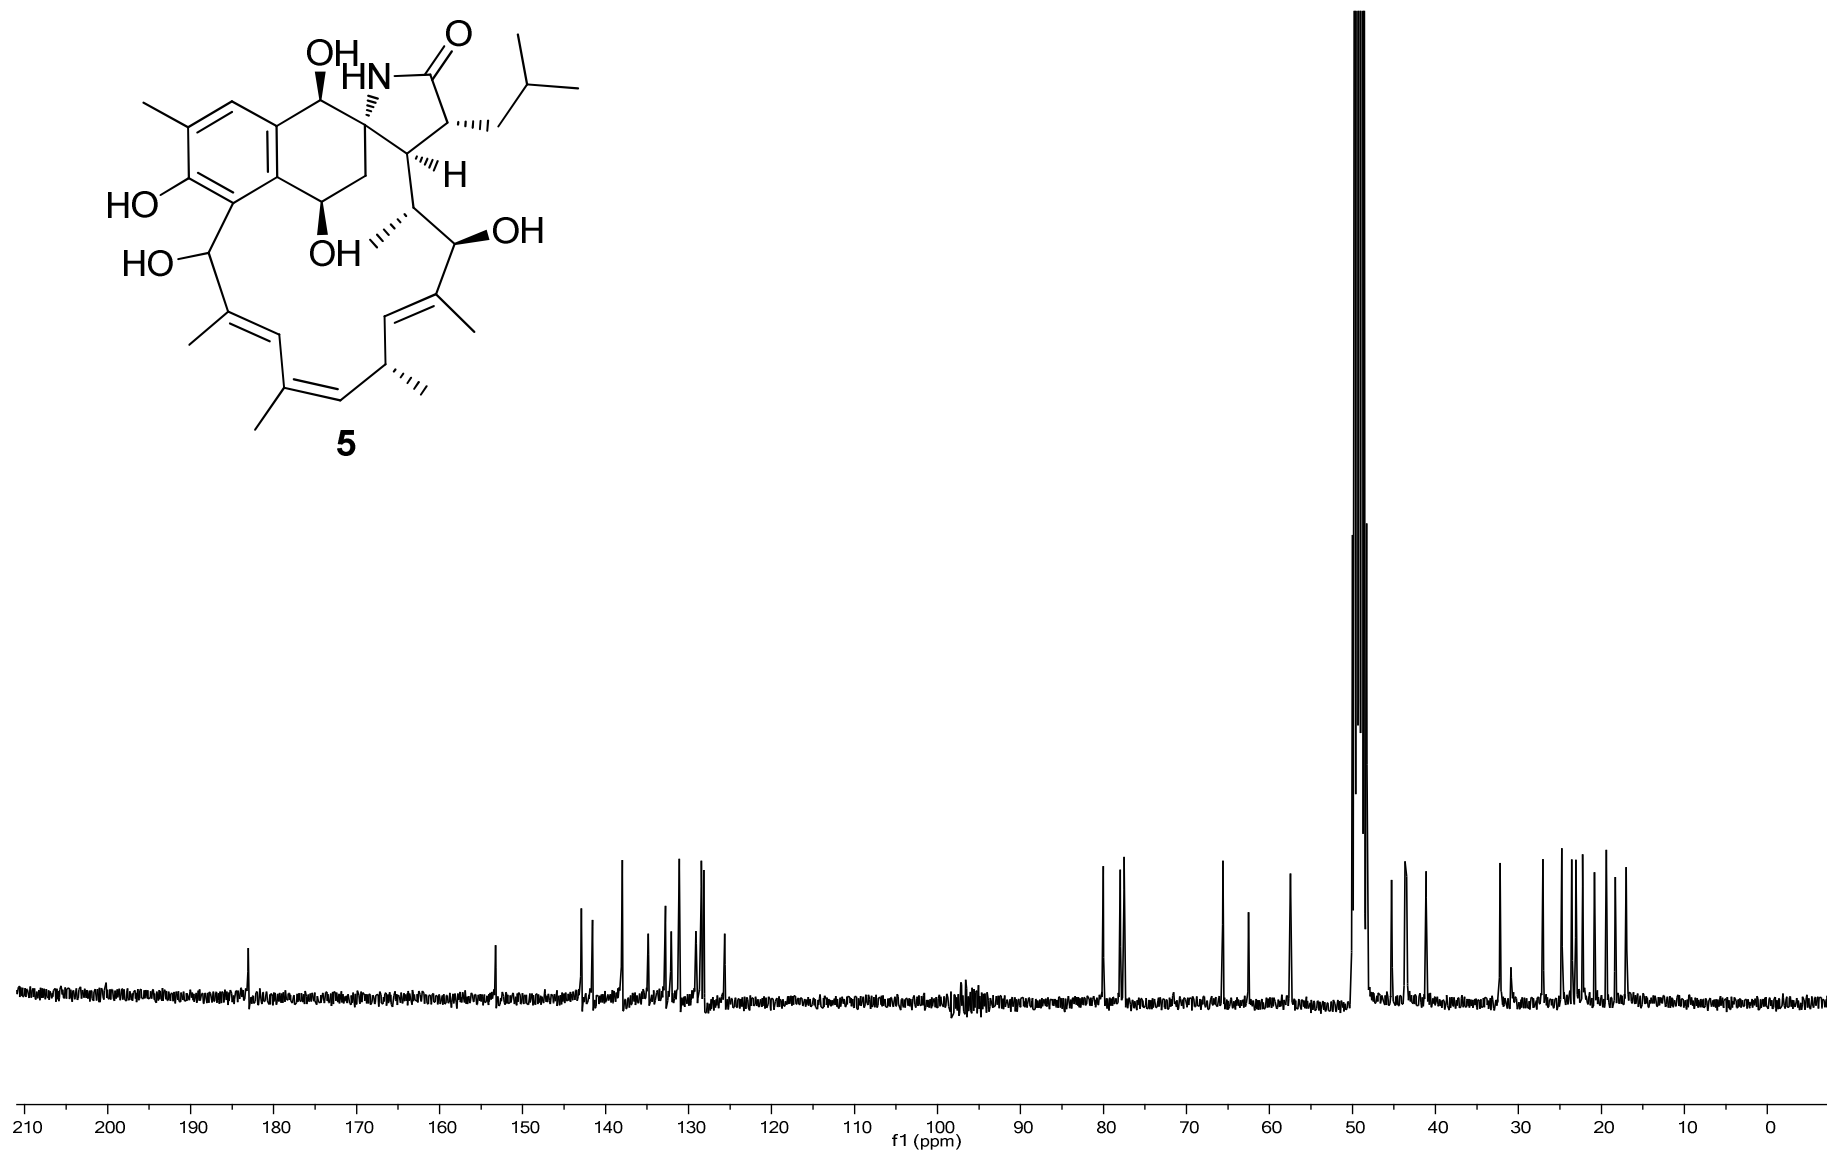

**Figure S11.**  $^1\text{H}$  NMR spectrum (600 MHz) of *bis-S*-MTPA ester (**6a**) of compound **5** in methanol- $d_4$

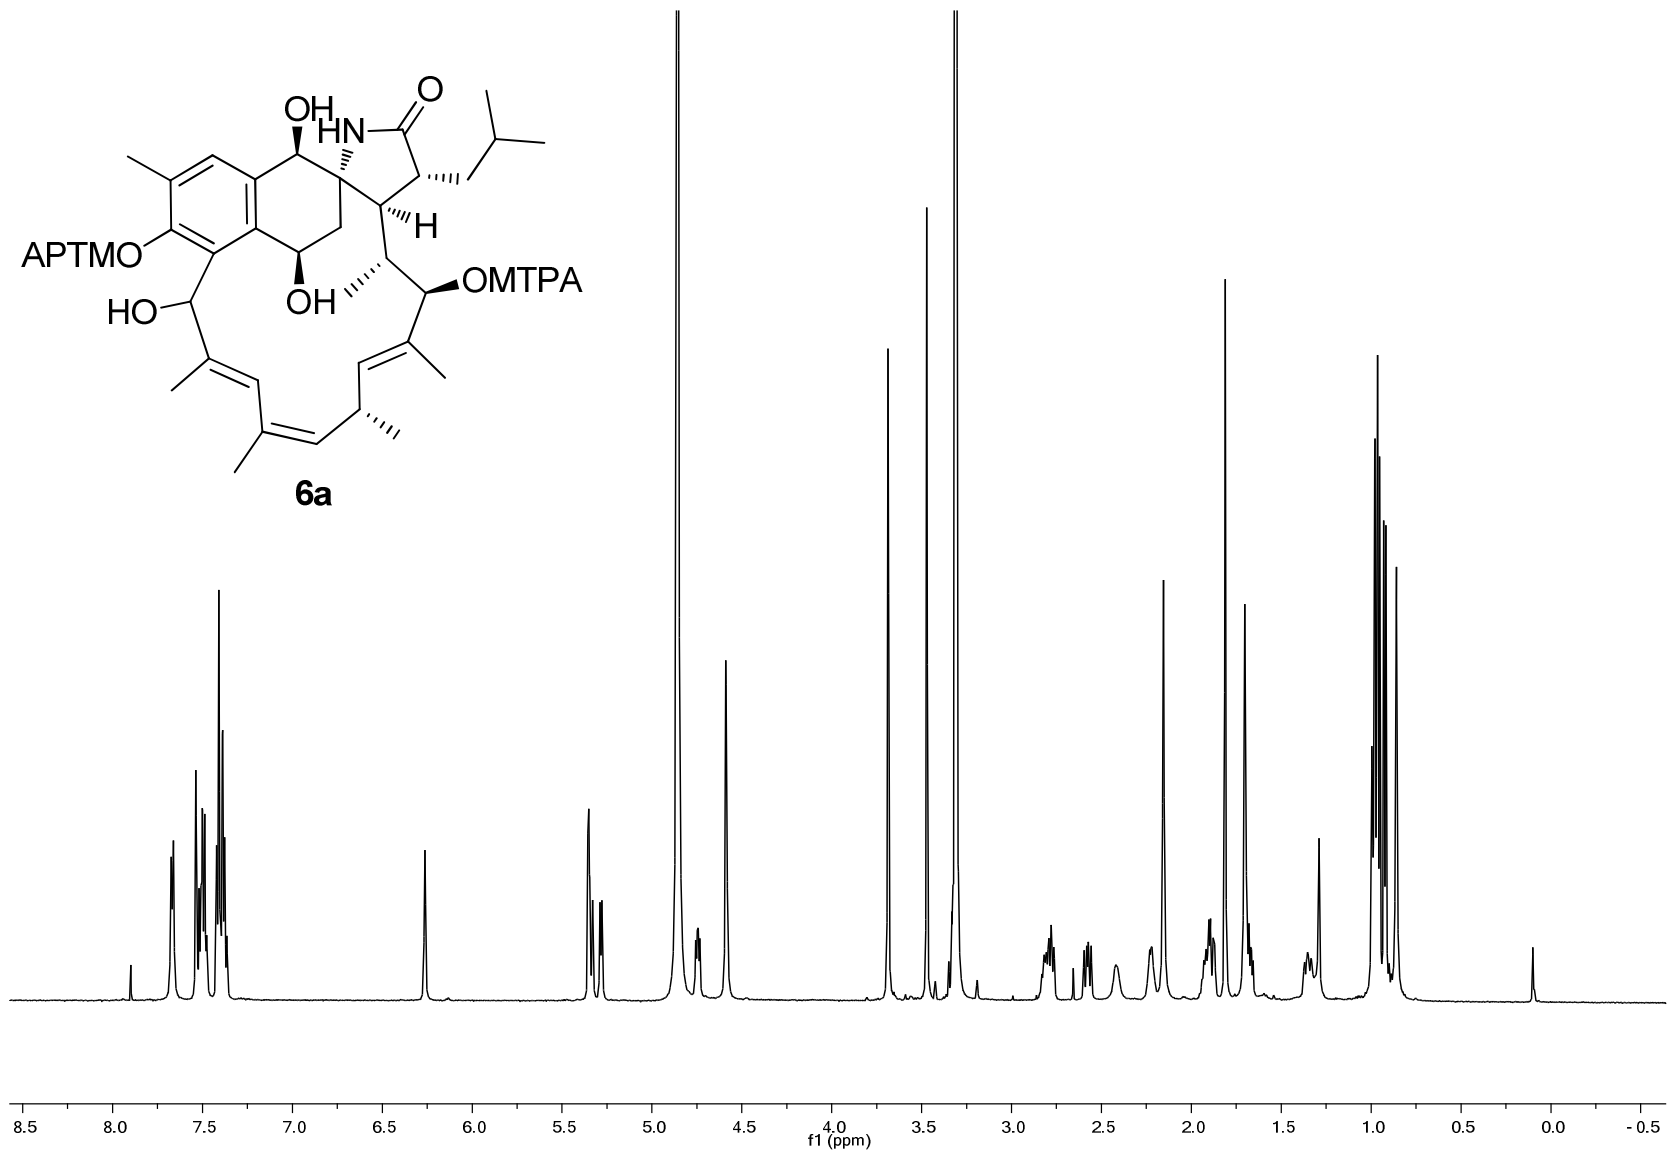

**Figure S12.**  $^1\text{H}$  NMR spectrum (600 MHz) of *bis-R*-MTPA ester (**6b**) from compound **5** in methanol- $d_4$

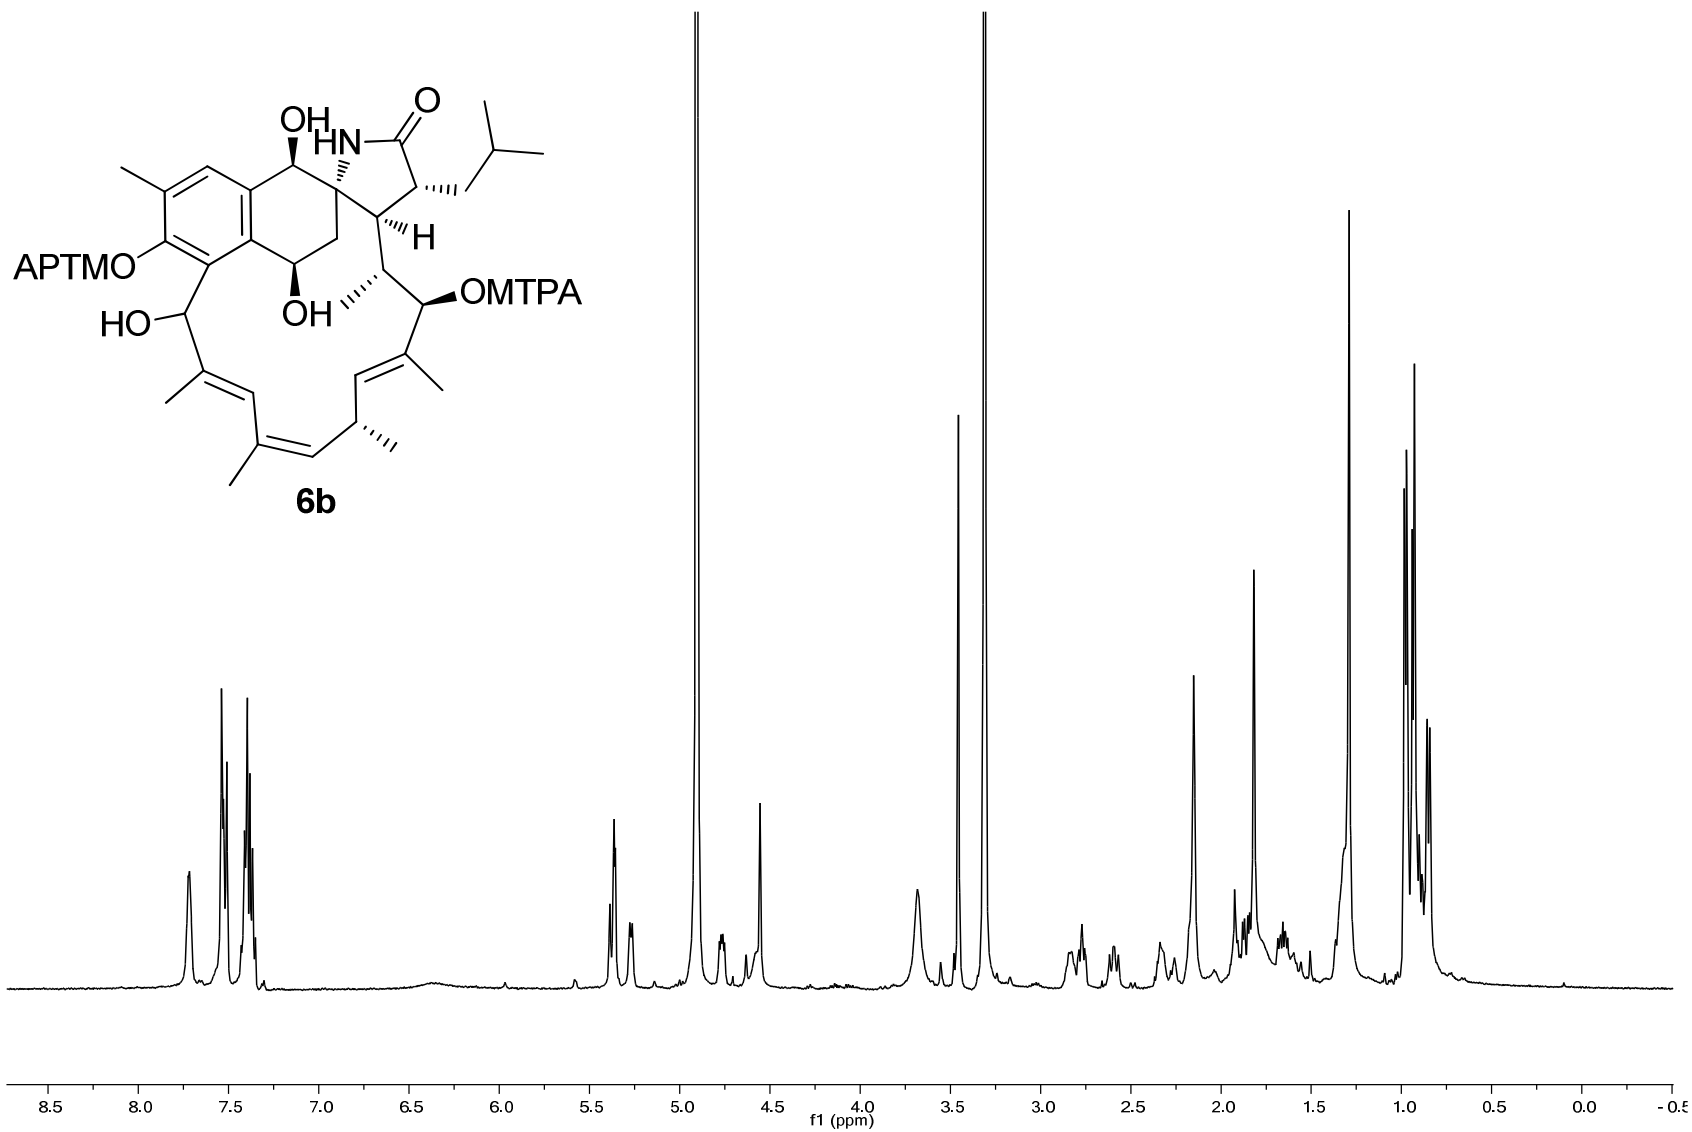

**Figure S13.**  $^1\text{H}$  NMR spectrum (600 MHz) of vicinal diol **7** from ansalactam A (**4**) in methanol- $d_4$

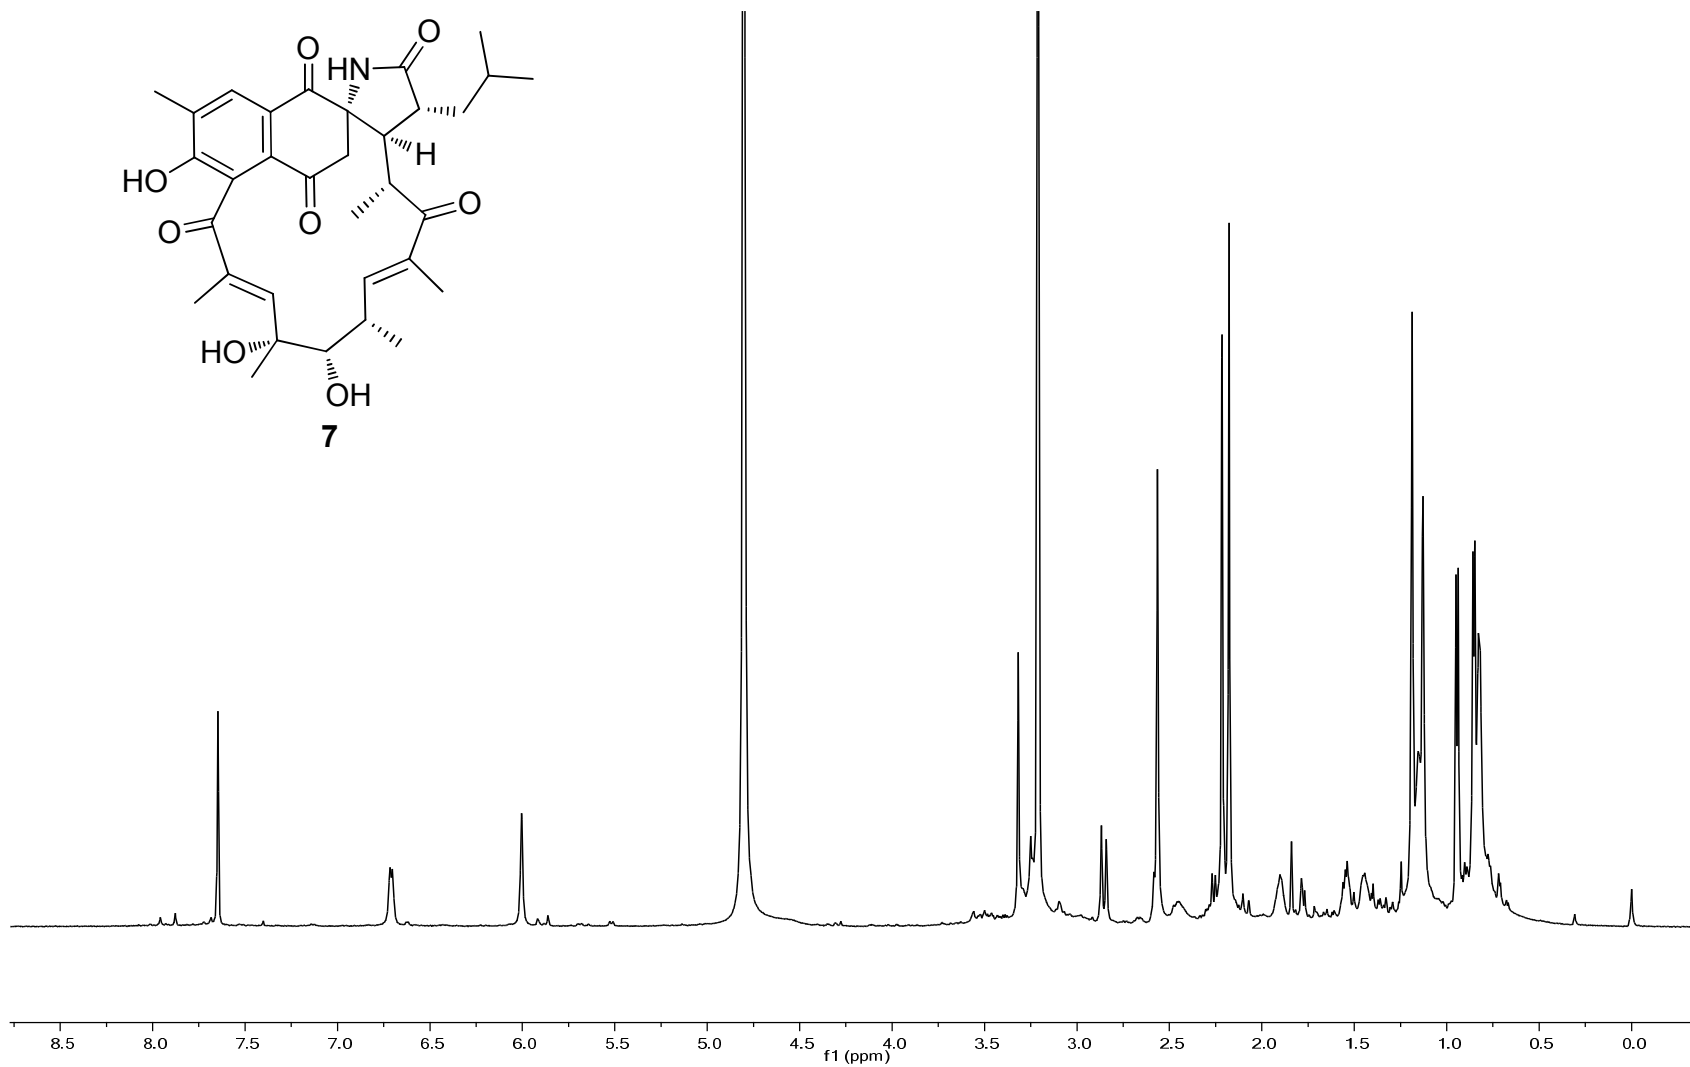

**Figure S14.**  $^1\text{H}$  NMR spectrum (600 MHz) of *bis-S*-MTPA ester (**8a**) from compound **7** in  $\text{DMSO-}d_6$ .

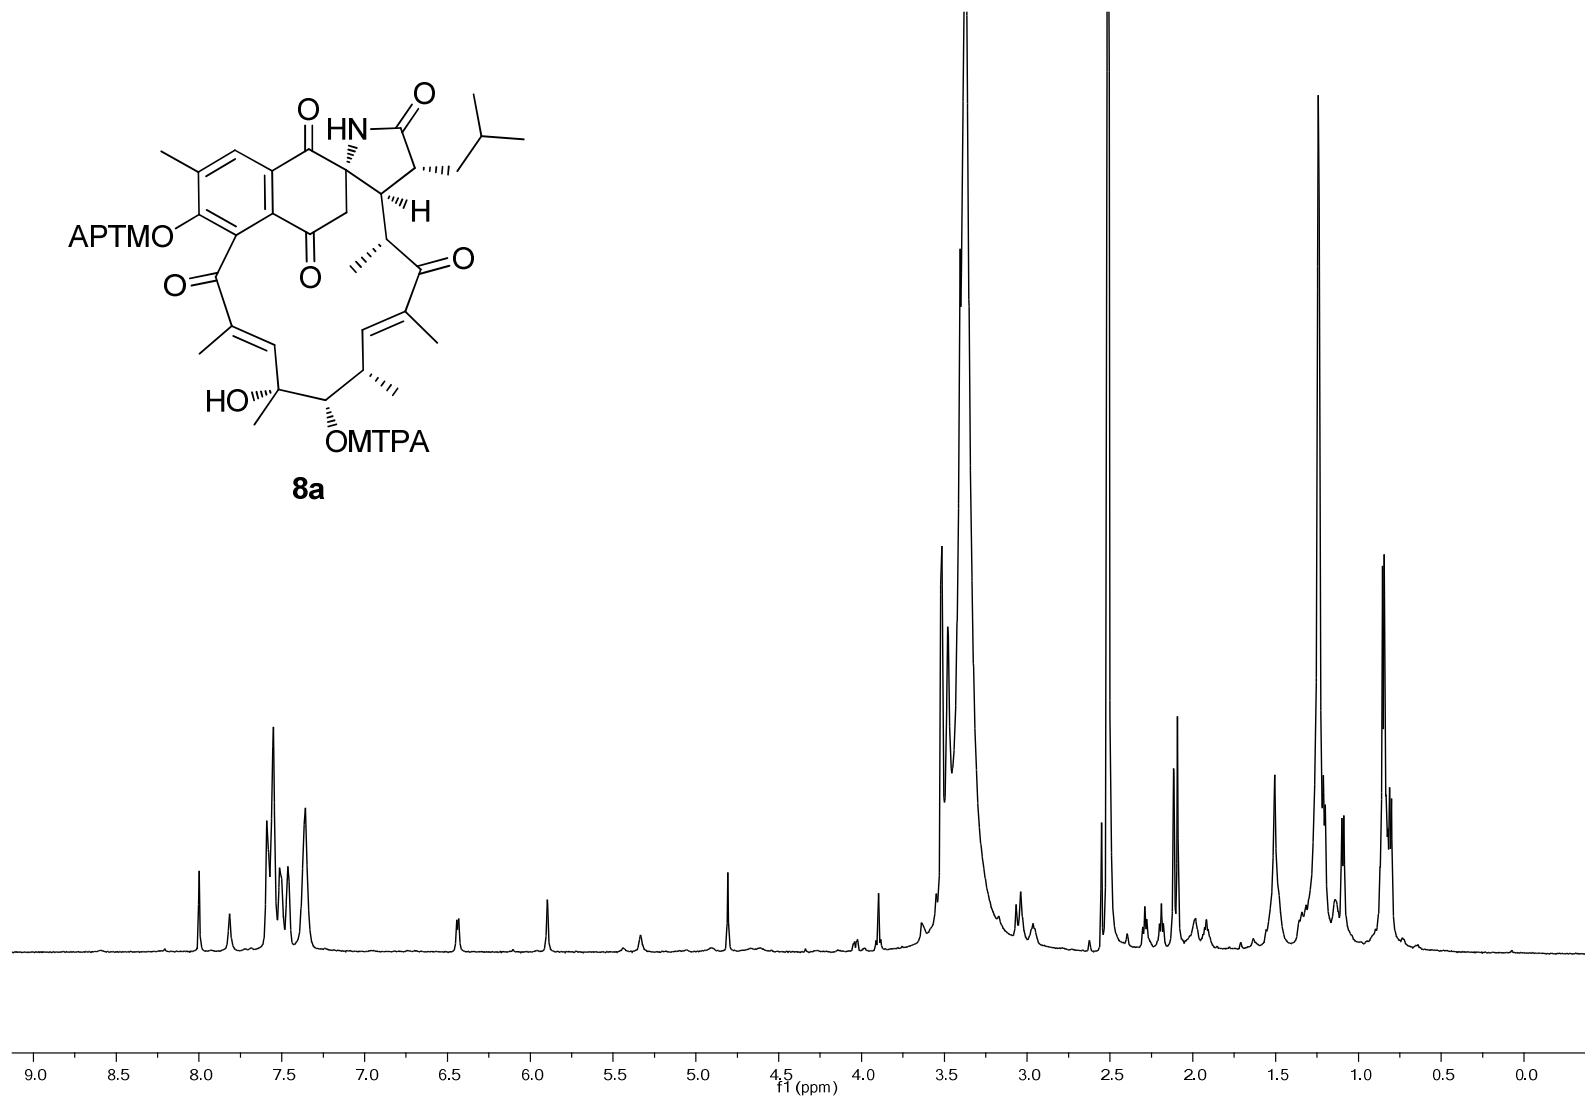

**Figure S15.**  $^1\text{H}$  NMR spectrum (600 MHz) of *bis-R*-MTPA ester (**8b**) from compound **7** in  $\text{DMSO-}d_6$

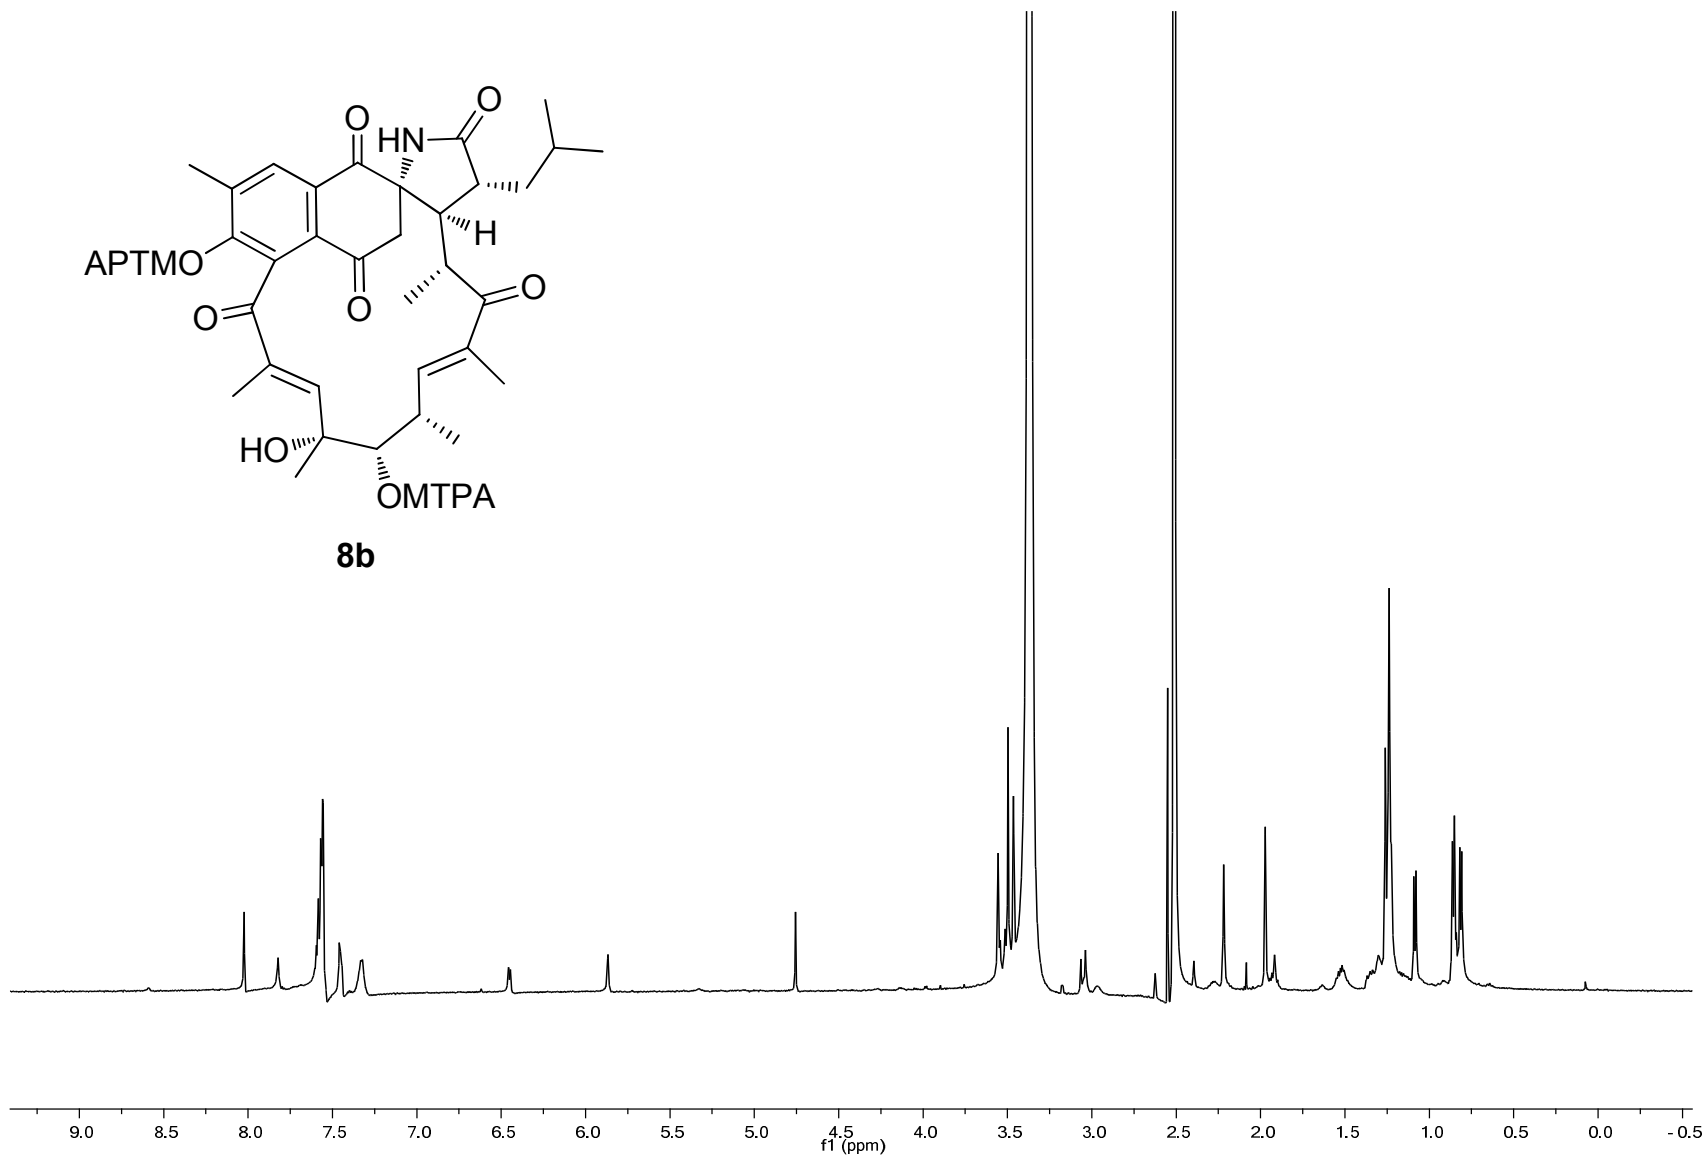



**Figure S16.**  $^{13}\text{C}$  NMR spectrum (125 MHz) of **5** not enriched from  $[1-^{13}\text{C}]$ leucine feeding study in methanol- $d_4$

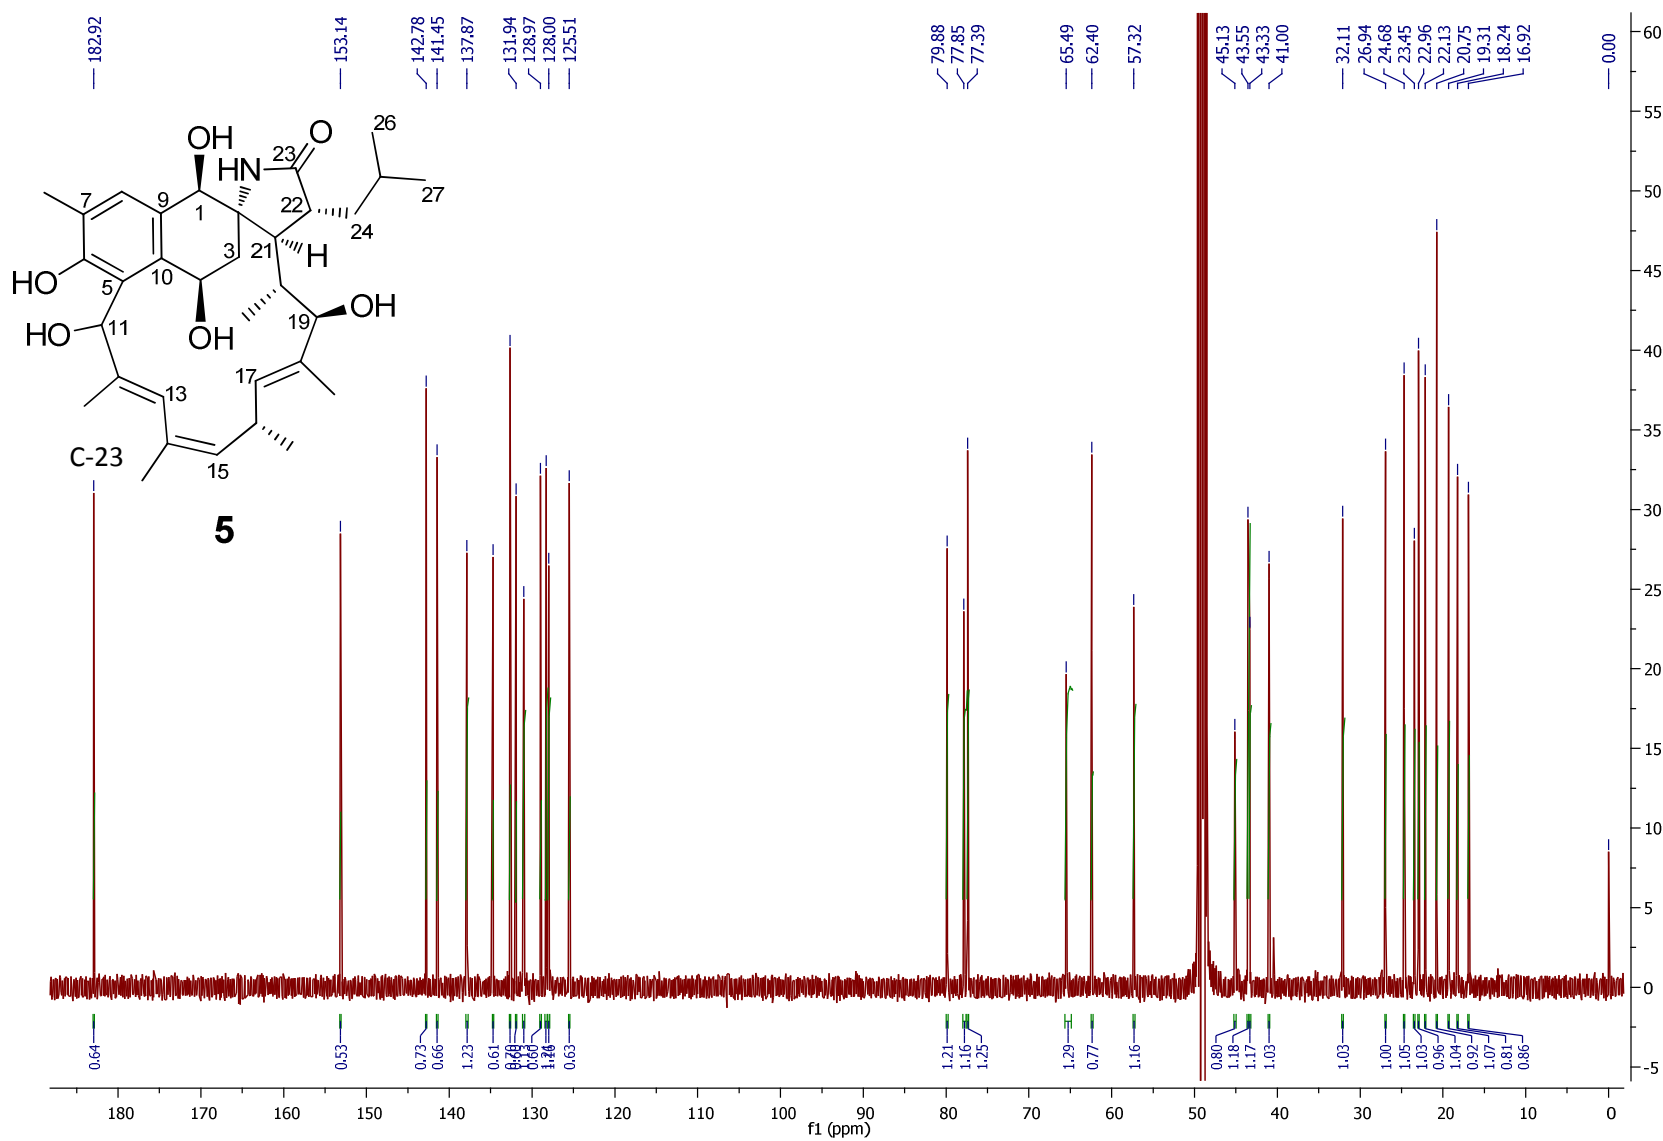

**Figure S17.**  $^{13}\text{C}$  NMR spectrum (125 MHz) of **5** from  $[1-^{13}\text{C}]$ propionate feeding study in methanol- $d_4$

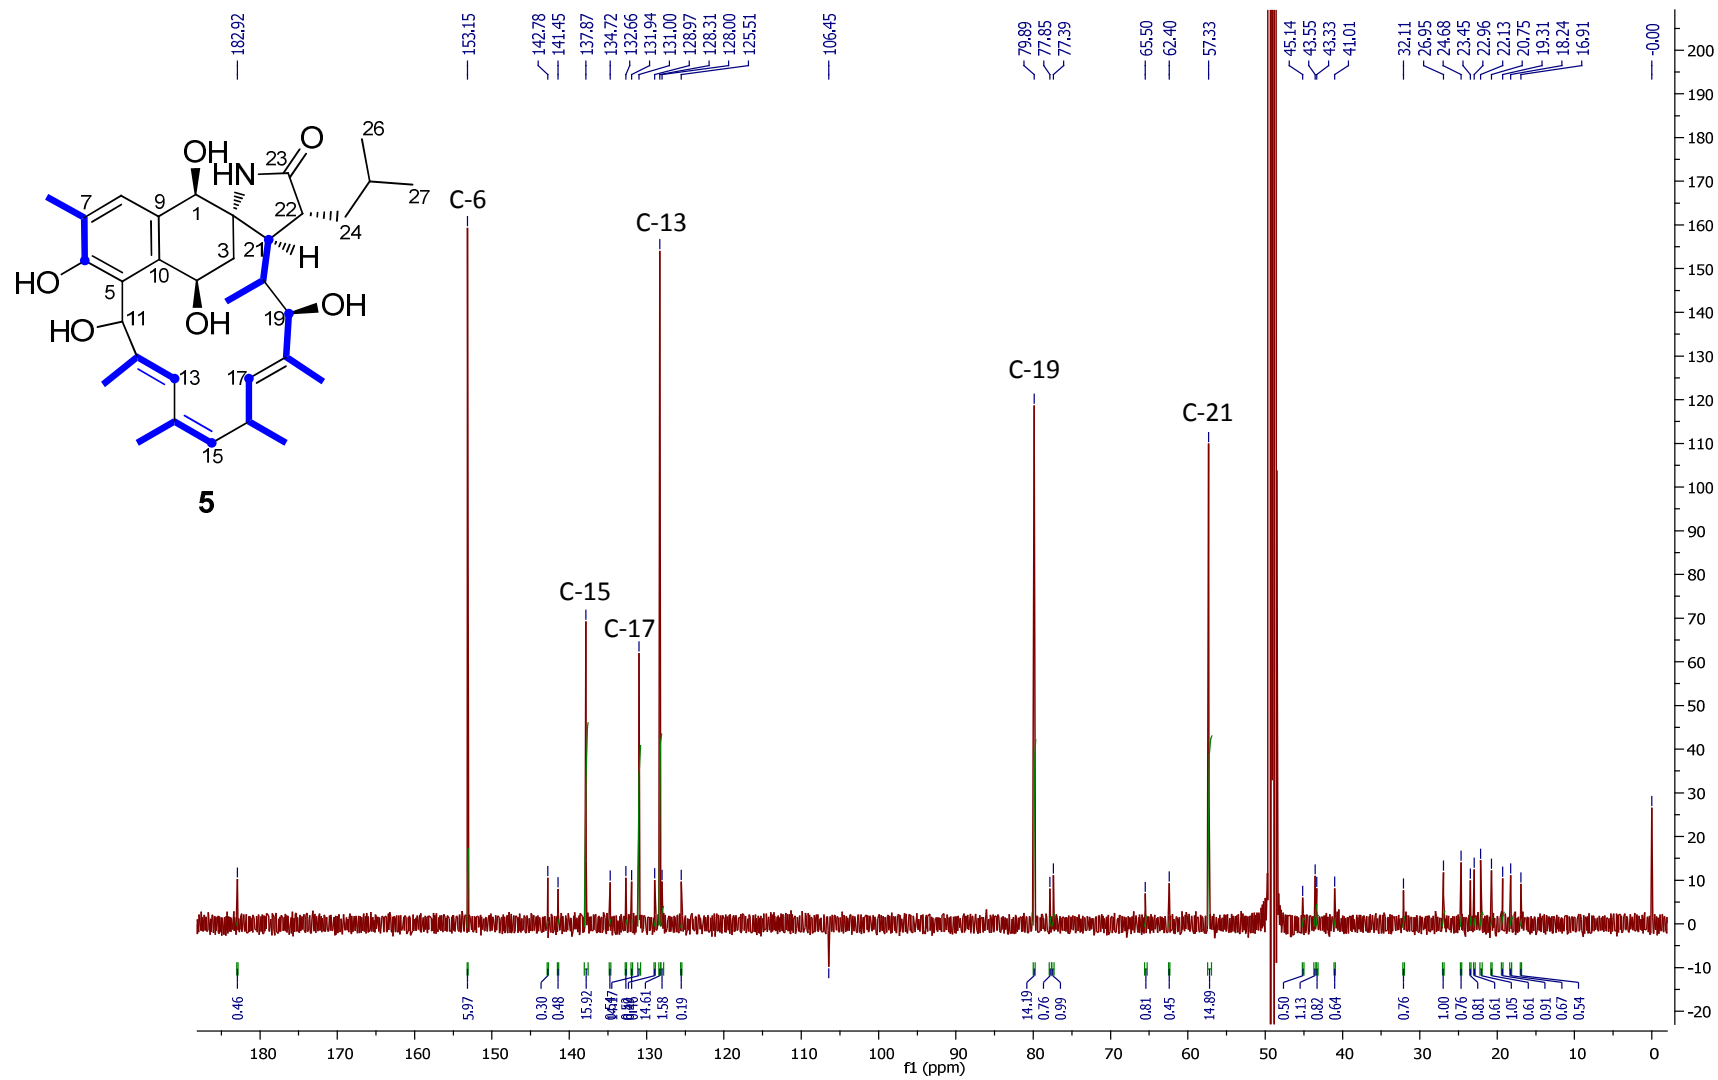

**Figure S18.**  $^{13}\text{C}$  NMR spectrum (125 MHz) of **5** from  $[1,2-^{13}\text{C}_2]$ acetate feeding study in methanol- $d_4$

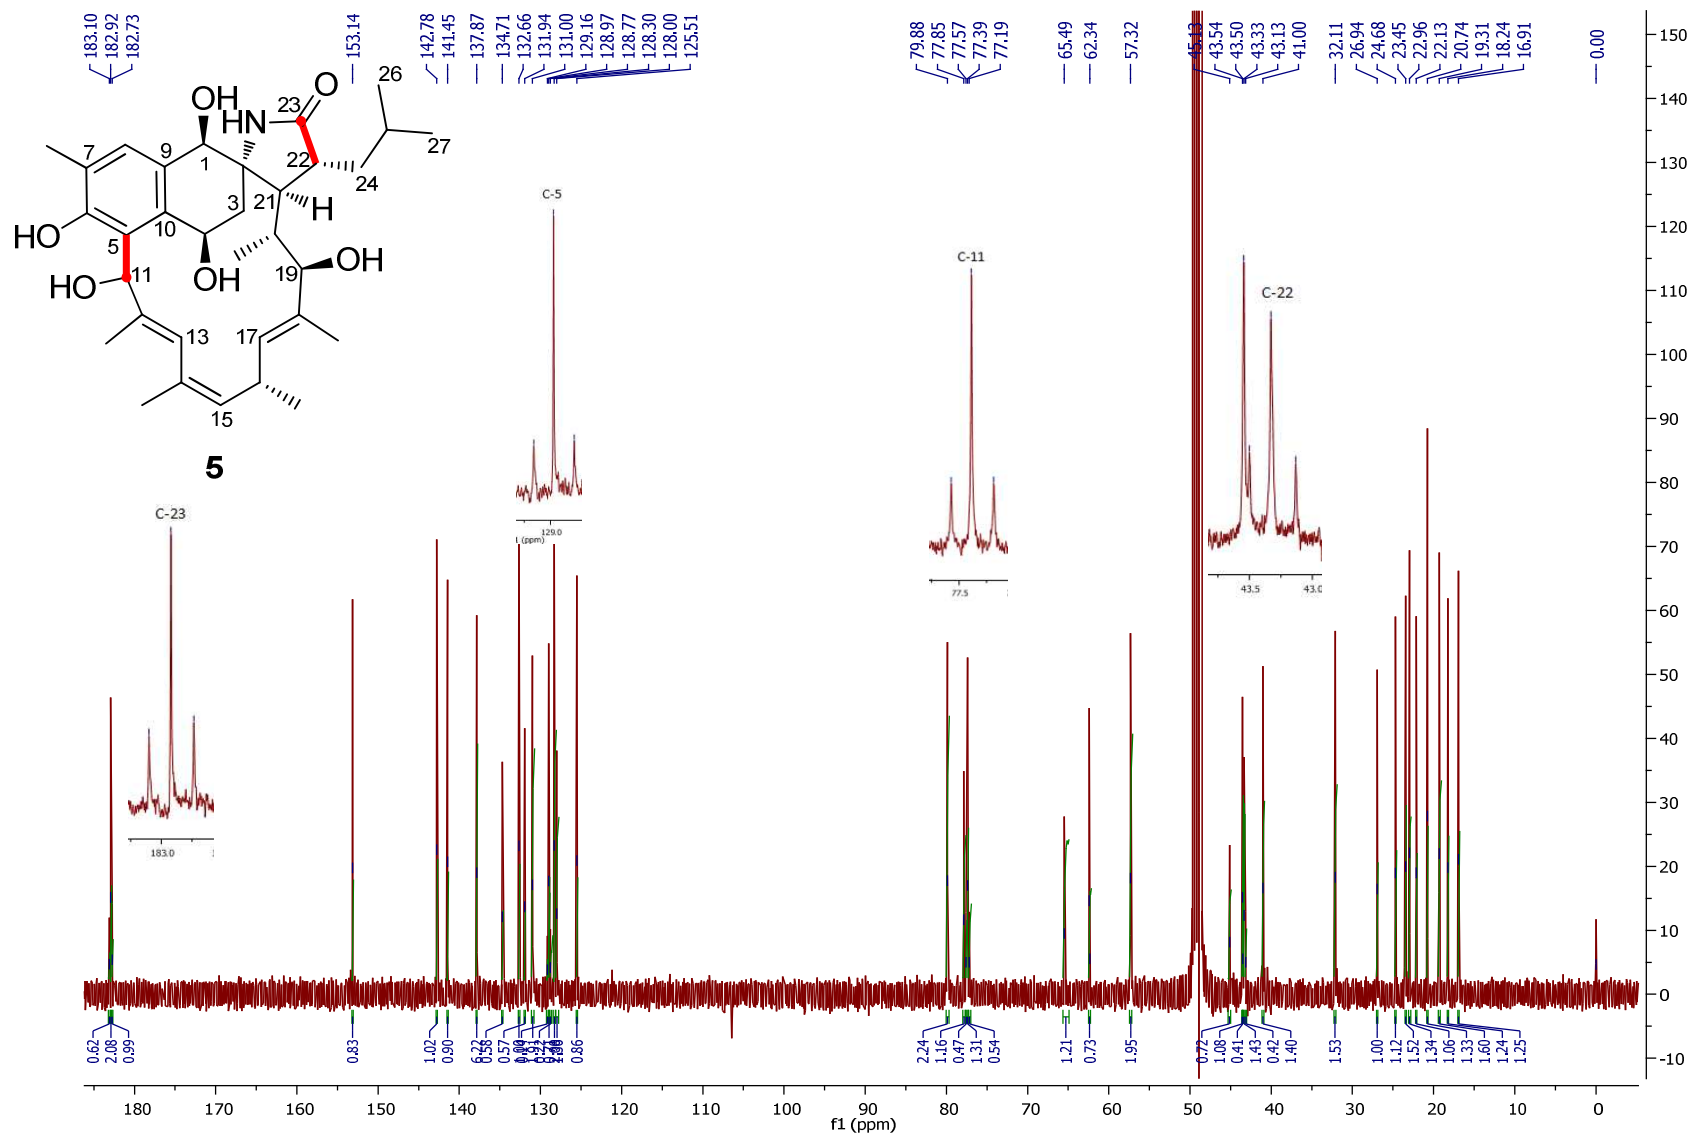

**Figure S19.**  $^{13}\text{C}$  NMR spectrum (125 MHz) of **5** from  $[1-^{13}\text{C}]$ isobutyrate feeding study in methanol- $d_4$

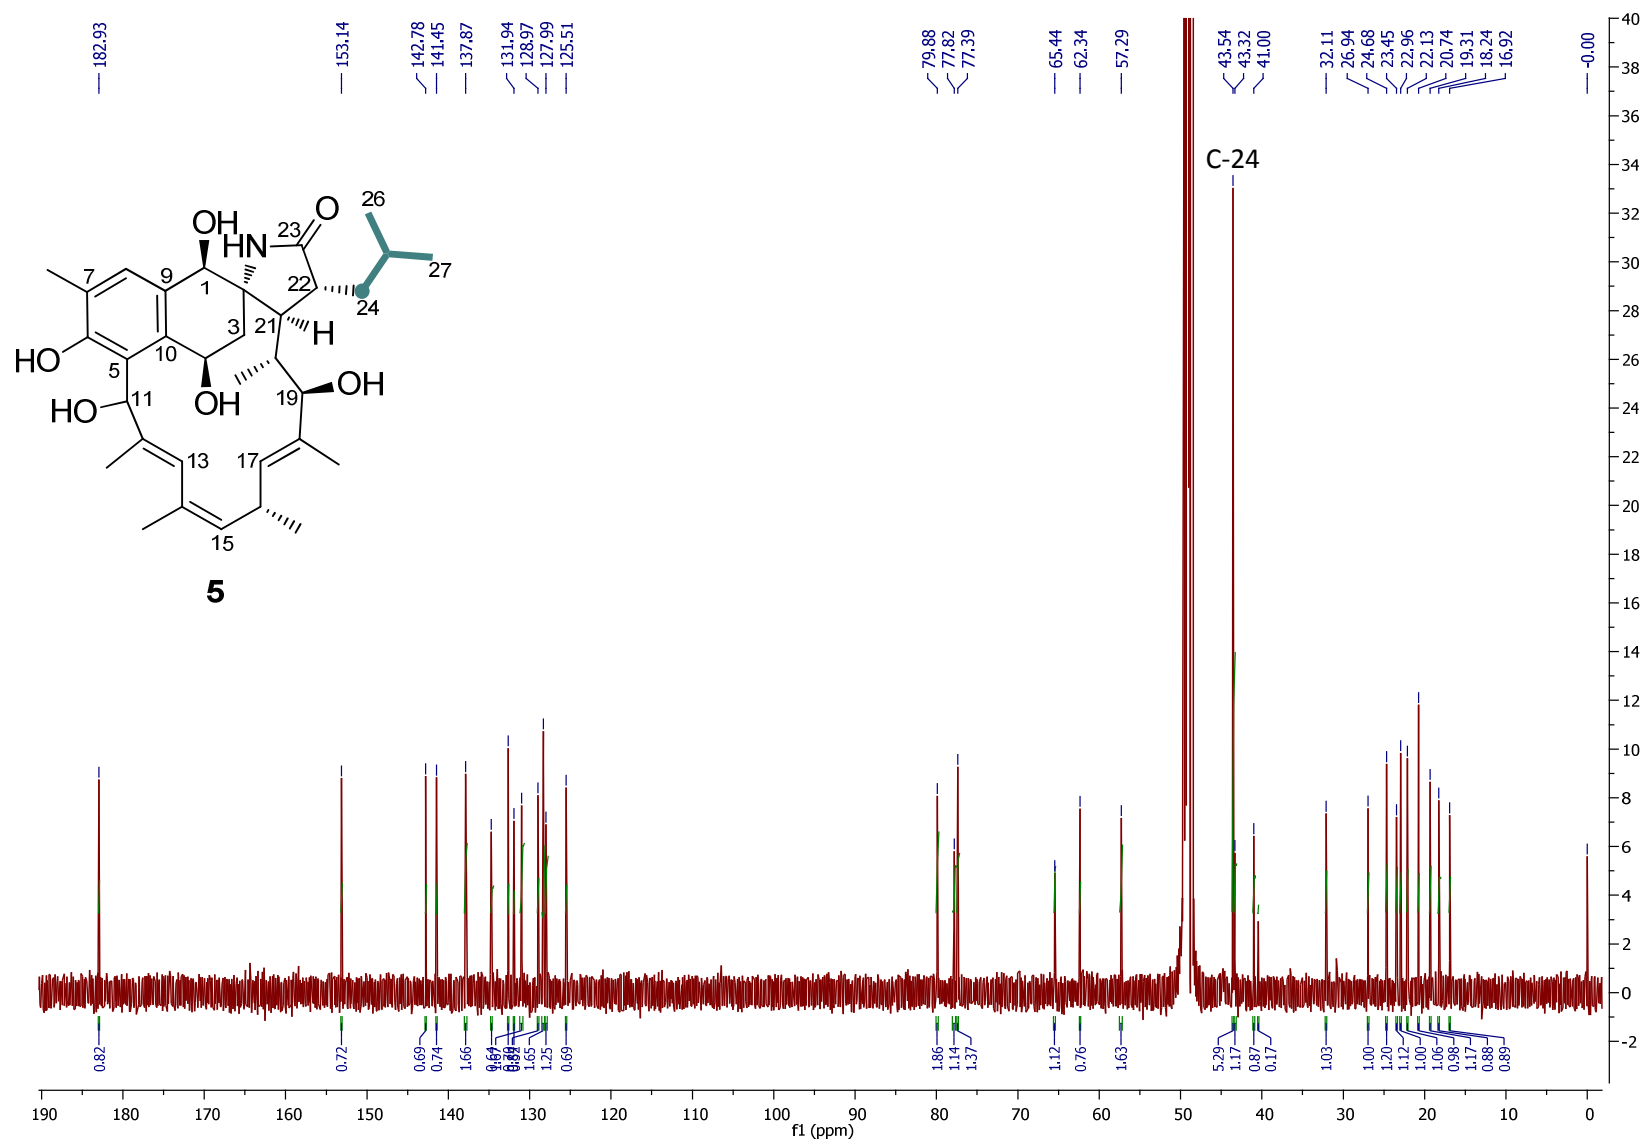

**Figure S20.**  $^{13}\text{C}$  NMR spectrum (125 MHz) of **5** from  $[1-^{13}\text{C}]$ isobutyrate feeding study in methanol- $d_4$  (expanded).

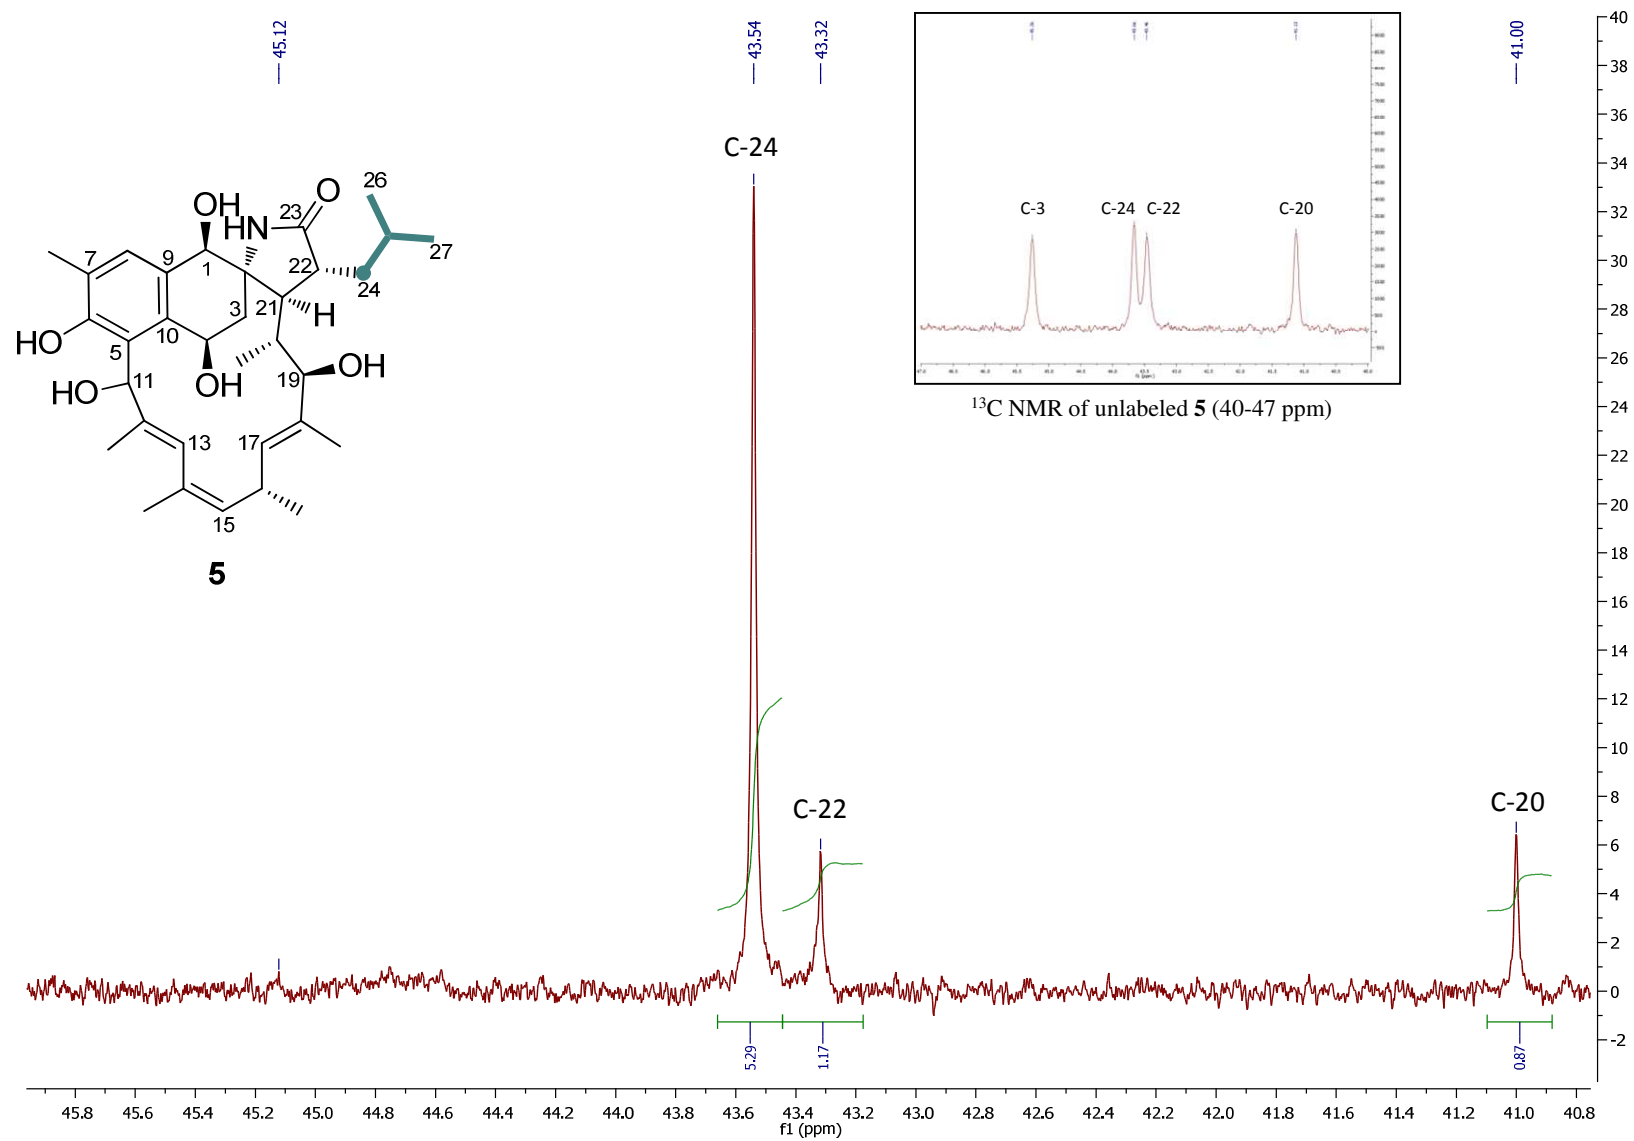

**Figure S21.**  $^{13}\text{C}$  NMR spectrum (125 MHz) of **5** from  $[2-^{13}\text{C}]4\text{-Me-2-pentenoic acid}$  feeding study in methanol- $d_4$

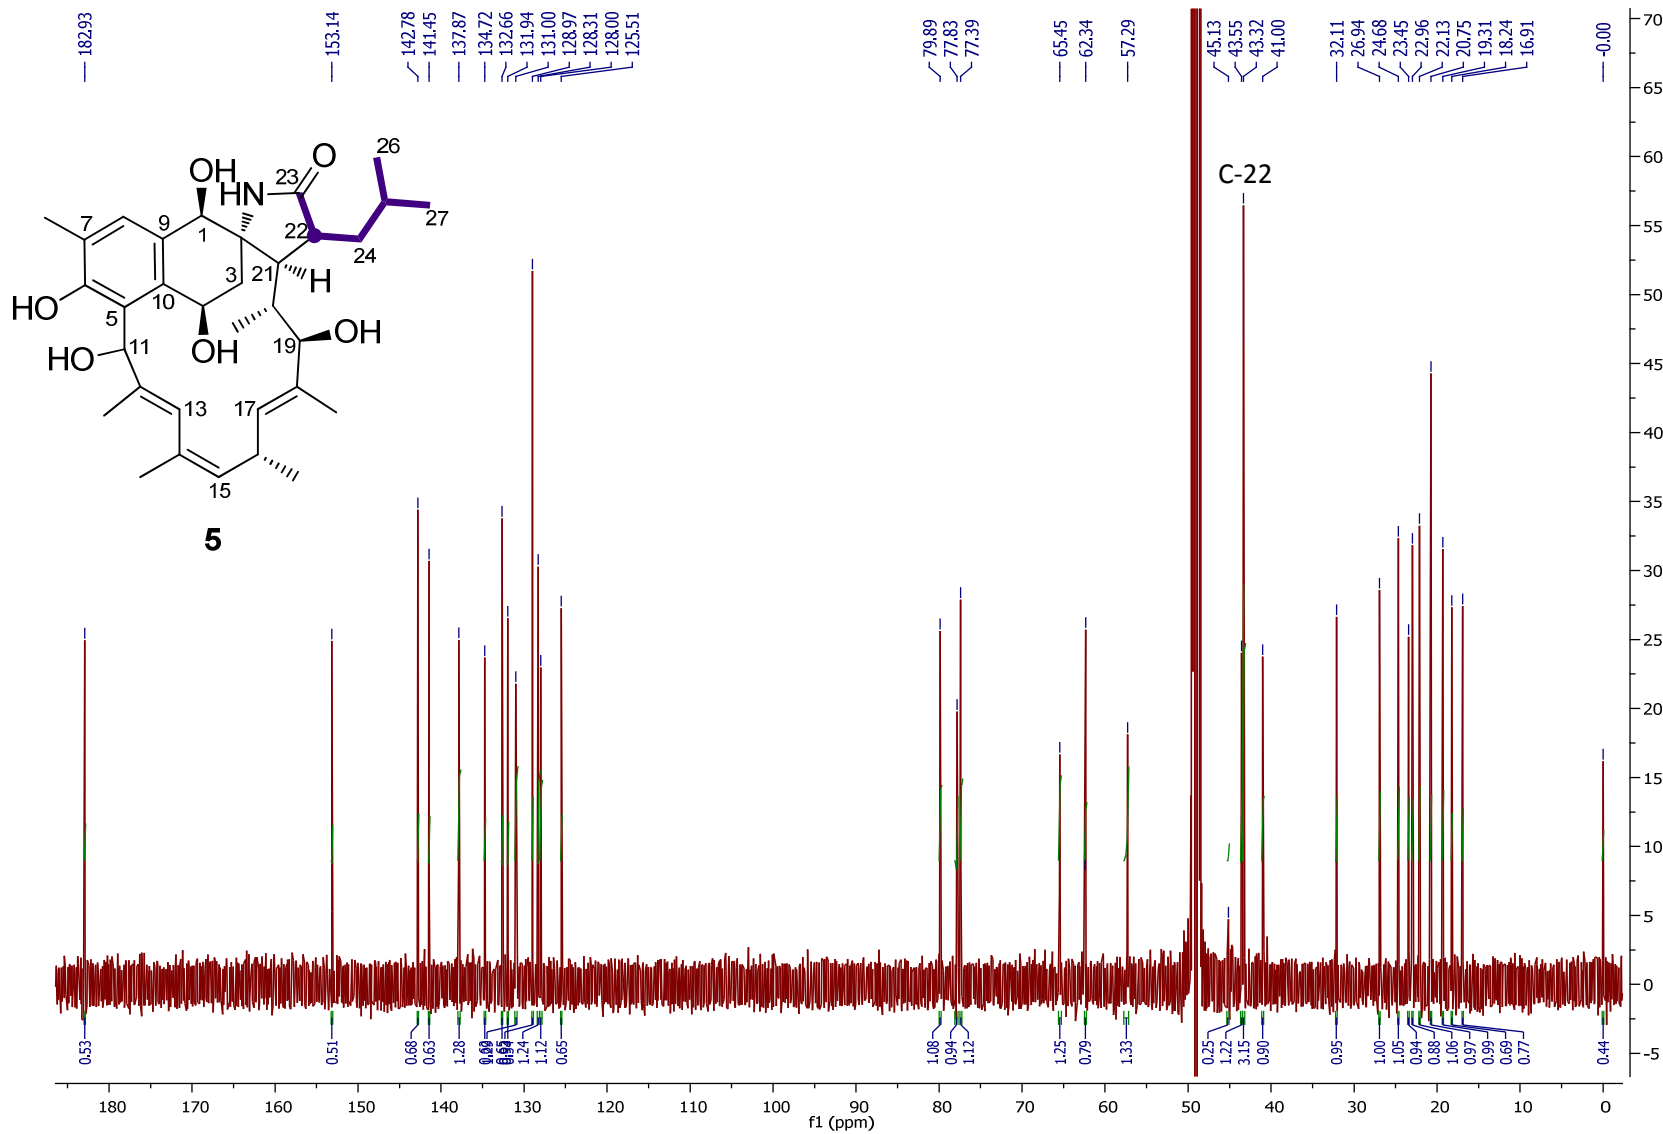

**Figure S22.**  $^{13}\text{C}$  NMR spectrum (125 MHz) of **5** from  $[2-^{13}\text{C}]4\text{-Me-2-pentenoic acid}$  feeding study in methanol- $d_4$  (expanded).

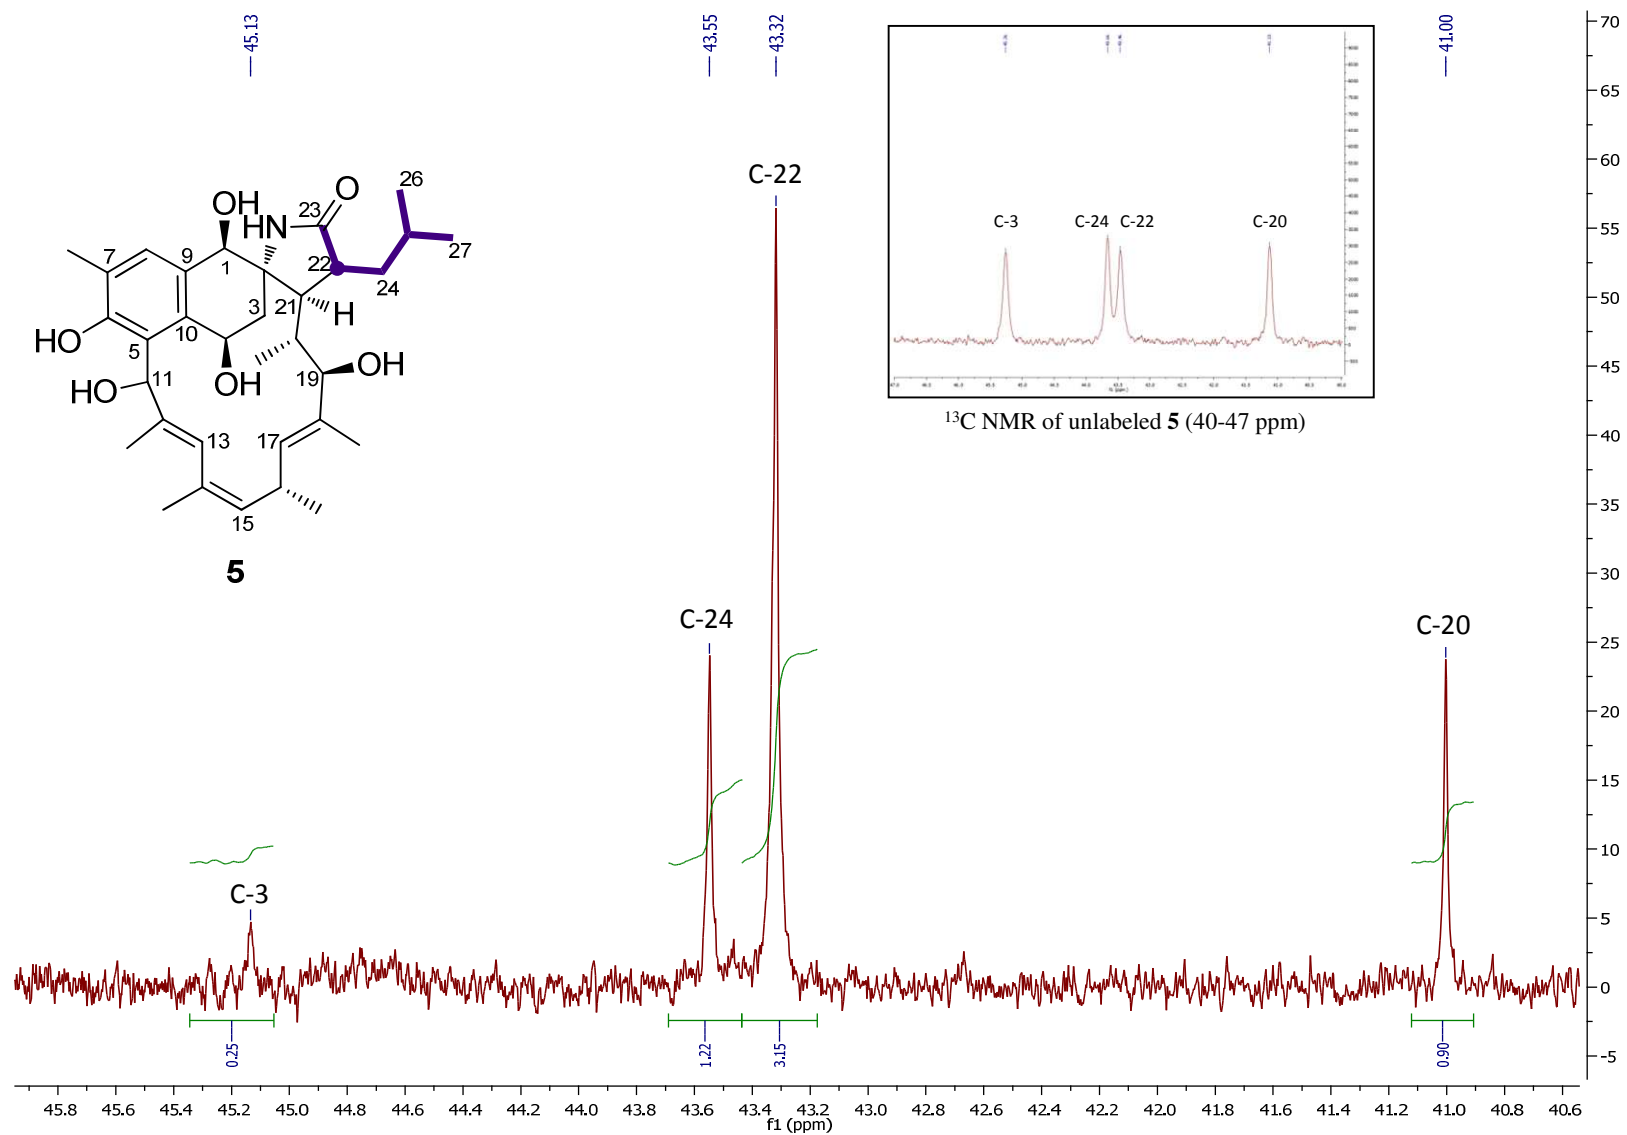

## References

- (1) Huitu, Z.; Linzhuan, W.; Aiming, L.; Guizhi, S.; Feng, H.; Qiuping, L.; Yuzhen, W.; Huanzhang, X.; Qunjie, G.; Yiguang, W. *J. Appl. Microbiol.* **2009**, *106*, 755.

## Complete Reference 17

Mo, S.; Kim, D. H.; Lee, J. H.; Park, J. W.; Basnet, D. B.; Ban, Y. H.; Yoo, Y. J.; Chen, S.-w.; Park, S. R.; Choi, E. A.; Kim, E.; Jin, Y.-Y.; Lee, S.-K.; Park, J. Y.; Liu, Y.; Lee, M. O.; Lee, K. S.; Kim, S. J.; Kim, D.; Park, B. C.; Lee, S.-g.; Kwon, H. J.; Suh, J.-W.; Moore, B. S.; Lim, S.-K.; Yoon, Y. J. *J. Am. Chem. Soc.*, accepted.
